# Supplementary material
Source: publisher figshare collection journal article supplement (https://tandf.figshare.com/ndownloader/files/14412077)
Supplement: Supplementary file 1 [file 14412077]

# Supplementary Material

# Synthesis of Novel 1,4 naphthoquinone-based molecules by an Ugi-type four-component reaction

Waléria F. Rabêlo a and Radell Echemendía a,b,*

*a Department of Chemistry, Federal University of São Carlos - UFSCar, São Carlos, 13565-905, São Paulo, Brazil*

*b Center for Natural Products Research, Faculty of Chemistry, University of Havana, Zapata y G, 10400, La Habana, Cuba.*

*Corresponding author Email: [rechemendia@fq.uh.cu](mailto:rechemendia@fq.uh.cu); Tel. +537 8792331

**Table of Contents**

Experimental Section. General S3

Synthesis of 2-Hydroxy-3-nitro-1,4-naphthoquinone **1** S3

General procedure for the multicomponent conjugation A S3-S4

Analytical data of 3-nitro-1,4-naphthoquinone compounds S4-S10

1H and 13C NMR spectra in CDCl3 of compound **2a**  S11

1H and 13C NMR spectra in CDCl3 of compound **2b**  S12

1H and 13C NMR spectra in CDCl3 of compound **2c**  S13

1H and 13C NMR spectra in CDCl3 of compound **2d**  S14

1H and 13C NMR spectra in CDCl3 of compound **2e**  S15

1H and 13C NMR spectra in CDCl3 of compound **2f**  S16

1H and 13C NMR spectra in CDCl3 of compound **2g**  S17

1H and 13C NMR spectra in CDCl3 of compound **2h**  S18

1H and 13C NMR spectra in CDCl3 of compound **2i**  S19

1H and 13C NMR spectra in CDCl3 of compound **2j**  S20

1H and 13C NMR spectra in CDCl3 of compound **2k**  S21

1H and 13C NMR spectra in CDCl3 of compound **2l**  S22

1H and 13C NMR spectra in CDCl3 of compound **2m**  S23

1H and 13C NMR spectra in CDCl3 of compound **2n**  S24

1H and 13C NMR spectra in CDCl3 of compound **2o**  S25

HRMS (ESI-FT-QqTOF) of selected products S26-27

Chiral stationary-phase HPLC chromatogram of compound **5m** S28

Chiral stationary-phase HPLC chromatogram of compound **5n** S28

**Experimental Section**

**General:** Reagents and materials were used as received from commercially sources without further purification. Flash column chromatography was carried out using silica gel 60 (230-400 mesh) and analytical thin layer chromatography (TLC) was performed using Merck silica gel 60 F254 aluminium sheets. Visualization of the compounds was achieved by UV or KMnO4. 1H NMR and 13C NMR spectra were recorded at 400 MHz for 1H and 100 MHz for 13C, respectively. Chemical shifts (δ) are reported in parts per million relatives to the residual solvent signals, and coupling constants (J) are reported in hertz. High resolution mass spectra (HRMS) were recorded using electron spray ionization (ESI) (Hybrid linear ion trap–orbitrap FT-MS /MS – and QqTOF Microtof – QII models). HPLC chromatograms were obtained on an apparatus with an LC-10AT Pump, SPD-10AUV-Vis Detector, SCL-10A System Controller, using a Chiralpak AD-H (4,6 mmØ  250 mmL, particle size 5 μm) column as chiral stationary phase.

***Compound******2b***: A suspension of 1,3-bis(methylamino)propane (63 μL, 0.5 mmol) paraformaldehyde (15 mg, 0.5 mmol) 2-hydroxy-3-nitro-1,4-naphthoquinone **1** (110 mg, 0.5 mmol) and cyclohexyl isocyanide (62 μL, 0.5 mmol) in MeOH (1 mL) were reacted according to the general procedure A. Flash column chromatography purification (*n*-hex/AcOEt 2:1) afforded compound **2b** (133 mg, 60%) as a pale yellow solid. 1H NMR (400 MHz, CDCl3) δ = 8.26-8.18 (m, 2 H); 7.85-7.72 (m, 2H); 5.91 (s, 1H); 4.01 (s, 2H); 3.89-3.81 (m, 1H); 3.36 (t, *J*=6.8 Hz, 2H); 2.80 (s, 3H); 2.50 (t, *J*= 6.9 Hz, 2H); 2.31 (s, 3H); 2.20-2.10 (m, 2H); 2.06-1.93 (m, 2H); 1.85-1.58 (m, 6H); 1.51-1.32 (m, 2H). 13C NMR (100 MHz, CDCl3) δ = 187.0, 183.1, 170.2, 147.4, 135.1, 135.0, 134.4, 133.6, 128.2, 127.0, 124.8, 59.6, 55.3, 52.1, 50.2, 42.1, 41.6, 32.1, 26.3, 25.2, 24.3. HRMS (ESI-FT-QQTOF) m/z: 443.2299 [M+H]+; calcd. for C23H31N4O5: 443.2294.

***Compound******2c***: A suspension of 1,3-bis(methylamino)propane (63 μL, 0.5 mmol) paraformaldehyde (15 mg, 0.5 mmol) 2-hydroxy-3-nitro-1,4-naphthoquinone **1** (110 mg, 0.5 mmol) and methyl isocyanoacetate (45 μL, 0.5 mmol) in MeOH (1 mL) were reacted according to the general procedure A. Flash column chromatography purification (*n*-hex/AcOEt 1:1) afforded compound **2c** (106 mg, 49%) as a pale yellow solid. 1H NMR (400 MHz, CDCl3) δ = 8.22-7.91 (m, 2 H); 7.78-7.62 (m, 2H); 5.98 (brs, 1H); 4.26 (s, 2H); 3.89 (s, 2H); 3.67 (s, 3H); 3.36 (t, *J*=6.7 Hz, 2H); 2.76 (s, 3H); 2.53 (t, *J*= 6.9 Hz, 2H); 2.37 (s, 3H); 2.08-1.90 (m, 2H). 13C NMR (100 MHz, CDCl3) δ = 188.2, 184.6, 173.4, 169.9, 146.2, 140.4, 136.5, 134.0, 130.9, 129.1, 127.9, 125.9, 60.4, 56.1, 53.8, 49.9, 48.3, 43.7, 40.7, 30.2. HRMS (ESI-FT-QQTOF) m/z: 433.1730 [M+H]+; calcd. for C20H25N4O7: 433.1723.

***Compound******2d***: A suspension of 1,3-bis(methylamino)propane (63 μL, 0.5 mmol) paraformaldehyde (15 mg, 0.5 mmol) 2-hydroxy-3-nitro-1,4-naphthoquinone **1** (110 mg, 0.5 mmol) and butyl isocyanide (52 μL, 0.5 mmol) in MeOH (1 mL) were reacted according to the general procedure A. Flash column chromatography purification (*n*-hex/AcOEt 3:1) afforded compound **2d** (114 mg, 55%) as a pale brown solid. 1H NMR (400 MHz, CDCl3) δ = 8.27-8.19 (m, 2 H); 7.86-7.72 (m, 2H); 5.72 (s, 1H); 4.16 (s, 2H); 4.09 (m, 1H); 3.42-3.30 (m, 4H); 2.77 (s, 3H); 2.50 (t, *J*= 7.0 Hz, 2H); 2.36 (s, 3H); 2.03-1.91 (m, 1H); 1.34-1.21 (m, 2H); 1.18-1.12 (m, 2H); 0.88 (t, *J*= 7.0 Hz, 3H). 13C NMR (100 MHz, CDCl3) δ = 187.2, 183.1, 170.2, 146.9, 135.2, 135.0, 134.2, 133.6, 128.5, 127.5, 124.8, 59.6, 55.8, 51.9, 42.8, 41.1, 39.1, 31.5, 25.8, 20.3, 12.6. HRMS (ESI-FT-QQTOF) *m/z*: 417.3148 [M+H]+; calcd. for C21H29N4O5: 417.3135.

***Compound******2e***: A suspension of piperazine (43 mg, 0.5 mmol) paraformaldehyde (15 mg, 0.5 mmol) 2-hydroxy-3-nitro-1,4-naphthoquinone **1** (110 mg, 0.5 mmol) and *tert*-butyl isocyanide (56 μL, 0.5 mmol) in MeOH (1 mL) were reacted according to the general procedure A. Flash column chromatography purification (*n*-hex/AcOEt 2:1) afforded compound **2e** (124 mg, 62%) as a pale brown solid. 1H NMR (400 MHz, CDCl3) δ = 8.23-8.13 (m, 2 H); 7.86-7.65 (m, 2H); 5.81 (s, 1H); 4.05 (s, 2H); 3.68-3.49 (m, 4H); 2.67-2.55 (m, 4H); 1.41 (s, 9H). 13C NMR (100 MHz, CDCl3) δ = 189.1, 182.9, 171.3, 147.4, 135.1, 134.8, 134.1, 133.3, 128.2, 127.6, 122.5, 60.1, 52.9, 52.6, 51.7, 29.1. HRMS (ESI-FT-QQTOF) *m/z*: 401.1832 [M+H]+; calcd. for C20H25N4O5: 401.1825.

***Compound******2f***: A suspension of piperazine (43 mg, 0.5 mmol) paraformaldehyde (15 mg, 0.5 mmol) 2-hydroxy-3-nitro-1,4-naphthoquinone **1** (110 mg, 0.5 mmol) and methyl isocyanoacetate (45 μL, 0.5 mmol) in MeOH (1 mL) were reacted according to the general procedure A. Flash column chromatography purification (*n*-hex/AcOEt 1:1) afforded compound **2f** (94 mg, 45%) as an orange solid. 1H NMR (400 MHz, CDCl3) δ = 88.26-8.11 (m, 2 H); 7.87-7.69 (m, 2H); 6.11 (s, 1H); 4.15 (s, 2H); 4.06 (s, 2H); 3.69 (s, 3H); 3.62 (t, *J*= 7.0 Hz, 2H); 2.67 (t, *J*= 7.0 Hz, 4H). 13C NMR (100 MHz, CDCl3) δ = 188.6, 181.5, 174.2, 171.8, 148.4, 136.1, 135.0, 134.7, 133.2, 128.5, 127.0, 121.9, 60.9, 52.9, 52.3, 51.4, 40.5. HRMS (ESI-FT-QQTOF) *m/z*: 417.1422 [M+H]+; calcd. for C19H21N4O7: 417.1410.

***Compound******2g***: A suspension of piperazine (43 mg, 0.5 mmol) paraformaldehyde (15 mg, 0.5 mmol) 2-hydroxy-3-nitro-1,4-naphthoquinone **1** (110 mg, 0.5 mmol) and benzyl isocyanide (61 μL, 0.5 mmol) in MeOH (1 mL) were reacted according to the general procedure A. Flash column chromatography purification (*n*-hex/AcOEt 4:1) afforded compound **2g** (115 mg, 53%) as yellowish solid. 1H NMR (400 MHz, CDCl3) δ = 8.26-8.19 (m, 2 H); 7.80-7.72 (m, 2H); 7.32-7.16 (m, 5H); 5.91 (s, 1H); 4.31 (s, 2H); 3.97 (s, 2H); 3.60 (t, *J*= 6.9 Hz, 4H); 2.65 (t, *J*= 6.8 Hz, 4H). 13C NMR (100 MHz, CDCl3) δ = 189.1, 182.9, 170.1, 148.1, 138.2, 135.3, 134.8, 134.1, 131.6, 128.5, 128.4, 127.9, 127.6, 127.1, 122.3, 60.2, 52.8, 52.5, 43.2. HRMS (ESI-FT-QQTOF) *m/z*: 435.1672 [M+H]+; calcd. for C23H23N4O5: 435.1668.

***Compound******2h***: of 1,3-bis(methylamino)propane (63 μL, 0.5 mmol) paraformaldehyde (15 mg, 0.5 mmol) 2-hydroxy-3-nitro-1,4-naphthoquinone **1** (110 mg, 0.5 mmol) and cyclohexyl isocyanide (62 μL, 0.5 mmol) in MeOH (1 mL) were reacted according to the general procedure A. Flash column chromatography purification (*n*-hex/AcOEt 5:1) afforded compound **2h** (82 mg, 35%) as yellowish oil. 1H NMR (400 MHz, CDCl3) δ = 8.26-8.15 (m, 2 H); 7.89-7.70 (m, 2H); 6.01 (s, 1H); 4.11-4.02 (m, 1H); 3.92 (s, 3H); 3.62 (t, *J*= 6.5 Hz, 4H); 2.58 (t, *J*= 6.8 Hz, 2H); 2.36 (s, 3H); 2.10-2.05 (m, 2H);2.00-1.95 (m, 2H); 1.84-1.75 (m, 3H); 1.74-1.67 (m, 2H); 1.65-1.60 (m, 1H); 1.46 (s, 6H) 1.43-1.29 (m, 2H) . 13C NMR (100 MHz, CDCl3) δ = 187.2, 183.6, 175.1, 147.6, 135.3, 135.0, 134.2, 133.6, 128.5, 127.2, 124.6, 69.3, 52.2, 50.3, 48.2, 41.7, 37.6, 32.2, 26.0, 25.7, 25.1, 24.1. HRMS (ESI-FT-QQTOF) *m/z*: 435.1676 [M+H]+; calcd. for C23H23N4O5: 435.1668.

***Compound******2i***: of 1,3-bis(methylamino)propane (63 μL, 0.5 mmol) paraformaldehyde (15 mg, 0.5 mmol) 2-hydroxy-3-nitro-1,4-naphthoquinone **1** (110 mg, 0.5 mmol) and *tert*-butyl isocyanide (56 μL, 0.5 mmol) in MeOH (1 mL) were reacted according to the general procedure A. Flash column chromatography purification (*n*-hex/AcOEt 5:1) afforded compound **2i** (87mg, 39%) as yellowish oil. 1H NMR (400 MHz, CDCl3) δ = 8.23-8.12 (m, 2 H); 7.85-7.70 (m, 2H); 6.17 (s, 1H); 3.57 (s, 3H); 3.49 (t, *J*= 6.8 Hz, 2H); 2.48 (t, *J*= 6.9 Hz, 2H); 2.26 (s, 3H); 2.10-1.98 (m, 2H);2.00-1.95 (m, 2H); 1.84-1.75 (m, 3H); 1.74-1.67 (m, 2H); 1.65-1.60 (m, 1H); 1.44 (s, 9H) 1.42 (s, 6H). 13C NMR (100 MHz, CDCl3) δ = 186.6, 182.9, 172.6, 147.1, 136.1, 135.0, 134.4, 133.2, 128.1, 127.2, 124.6, 69.1, 54.3, 52.2, 50.8, 41.3, 37.2, 28.8, 25.2, 24.1. HRMS (ESI-FT-QQTOF) *m/z*: 445.2466 [M+H]+; calcd. for C23H33N4O5: 445.2451.

***Synthesis of -D-glucosyl isocyanide***

To a solution of SnCl4 (234 μL, 2 mmol) in toluene (6.0 mL) a suspension of AgClO4 (415 mg, 2 mmol) in CH2Cl2 (60 mL) was added at room temperature. The mixture was stirred at room temperature for 1h in the absence of light. Then, the mixture was added to a solution of comercial (AcO)5-β-Glc (7.8 g, 20 mmol) and trimethylsilyl azide (TMSN3; 5.26 mL, 40 mmol) in CH2Cl2. The mixture was stirred at room temperature. After stirring for 3h at room temperature the residue was washed with saturated aqueous NaHCO3 and extracted with CH2Cl2, and the organic layer was dried over Na2SO4 and filtered. After solvent evaporation, the residue was purified by flash column chromatography (Hex/AcOEt 7:3), affording the title compound (AcO)4-β-Glc-N3 as white amorphous solid (6.72 g, 90%).

To a solution of (AcO)4-β-Glc-N3 (932 mg, 2.5 mmol) in anhydrous CH2Cl2 was added Pd/C (5%) (0.1 g). The mixture was stirred under H2 at atmospheric pressure for 2 h. The Pd/C (5%) was removed by filtration through Celite, and the filtrate was concentrated in vacuo to remove the CH2Cl2. Purification of the residue by flash column chromatography (Hex/AcOEt 1:1) afforded (AcO)4-β-Glc-NH2 as a white amorphous solid (738 mg, 85%).

A solution of acetic anhydride (1 mL, 1mmol) and formic acid (0.6 mL, 1.5 mmol) was heated at 60 °C for 3 h. The resulting solution was cooled to room temperature, then added to the amine (AcO)4-β-Glc-NH2 (347 mg, 1 mmol) solution and left under vigorous stirring overnight. The mixture was filtered through Celite and the solid obtained after concentration afford the crude formamide (AcO)4-β-Glc-NH-CHO. Without purification, the crude of reaction was dissolved in dry DCM (6 mL) under nitrogen, together with carbon tetrabromide (497 mg, 1.5 mmol) and TEA (280 µL, 2.0 mmol); the resulting solution was cooled to 20 °C. Triphenylphosphane (393 mg, 1.5 mmol) in dry DCM (5 mL) was added. After stirring at 20 °C for 30 min, the mixture was diluted with DCM, washed with a saturated solution of ammonium chloride and water, dried with anhydrous sodium sulfate and concentrated. Purification the residue by flash column chromatography (hexane/EtOAc 4:1) afforded (AcO)4-β-Glc-NC (296 mg, 83%). [α] D23 = +15.2 (*c* 0.54, MeOH, 23C). 1H NMR (400 MHz, CDCl3) δ= 5.19 (dt, *J* = 5.1, 1.5 Hz, 2H), 5.16-5.09 (m, 1H), 4.85-4.81 (m, 1H), 4.26 (dd, *J* = 12.6, 4.8 Hz, 1H), 4.16 (dd, *J* = 12.6, 2.3 Hz, 1H), 3.75 (ddd, *J* = 9.7, 4.8, 2.3 Hz, 1H), 2.12 (s, 3H), 2.12 (s, 3H), 2.03 (s, 3H), 2.02 (s, 3H).13C NMR (100 MHz, CDCl3) δ= 170.6, 170.1, 169.3, 168.9, 164.8, 79.5, 74.7, 72.2, 71.1, 67.4, 61.4, 20.7, 20.6, 20.5.

***Compound******2j***: A suspension of 1,3-bis(methylamino)propane (63 μL, 0.5 mmol) paraformaldehyde (15 mg, 0.5 mmol) 2-hydroxy-3-nitro-1,4-naphthoquinone **1** (110 mg, 0.5 mmol) and -D-glucosyl isocyanide (179 mg, 0.5 mmol) in MeOH (1 mL) were reacted according to the general procedure A. Flash column chromatography purification (*n*-hex/AcOEt 1:1) afforded compound **2j** (211 mg, 61%) as a white solid. 1H NMR (400 MHz, CDCl3) δ = 8.31-8.19 (m, 2 H); 7.84-7.67 (m, 2H); 6.36 (d, *J*= 7.0 Hz, 1H); 5.98 (t, *J*= 6.8 Hz, 1H); 5.75-5.68 (m, 1H); 5.45 (s, 1H); 5.41 (t, *J*= 7.0 Hz, 1H); 5.05 (t, *J*= 6.9 Hz, 1H ); 4.48-4.42 (m, 1H); 4.22 (d, *J*= 11.1 Hz, 1H ); 4.10-4.04 (m, 1H); 3.51-3.43 (m, 1H); 3.08-2.97 (m, 2H); 2.84 (d, *J*= 11.0 Hz, 1H ); 2.87 (s, 3H); 2.24 (s, 3H); 2.18-2.04 (4×s, 12H); 1.62-1.52 (m, 1H). 13C NMR (100 MHz, CDCl3) δ = 187.0, 183.5, 171.8, 171.2, 170.4, 169.9, 169.5, 145.2, 134.9, 134.1, 133.7, 128.2, 127.3, 124.1, 91.7, 83.5, 82.8, 80.5, 67.0, 62.3, 59.7, 55.3, 52.9, 42.8, 41.0, 25.6, 23.8, 21.7, 20.5, 18.1. HRMS (ESI-FT-QQTOF) *m/z*: 691.2468 [M+H]+; calcd. for C31H39N4O14: 691.2463.

***Compound 2k***: A suspension of piperazine (43 mg, 0.5 mmol) paraformaldehyde (15 mg, 0.5 mmol) 2-hydroxy-3-nitro-1,4-naphthoquinone **1** (110 mg, 0.5 mmol) and 4-methoxyphenyl isocyanide (66 mg, 0.5 mmol) in MeOH (1 mL) were reacted according to the general procedure A. Flash column chromatography purification (*n*-hex/AcOEt 3:1) afforded compound **2k** (153 mg, 68%) as amorphous brown solid. 1H NMR (400 MHz, CDCl3) δ = 8.48 (s, 1H); 8.27-8.19 (m, 2 H); 7.85-7.73 (m, 2H); 7.47 (d, *J*= 7.9 Hz, 2H); 6.98 (d, *J*= 8.0 Hz, 1H); 4.19 (s, 2H); 3.80 (s, 3H); 2.64 (t, *J*= 6.5 Hz, 4H). 13C NMR (100 MHz, CDCl3) δ = 187.4, 181.9, 170.1, 156.3, 147.6, 135.6, 134.8, 134.3, 134.1, 133.1, 128.8, 127.4, 122.2, 121.9, 115.4, 57.9, 53.3, 52.8, 45.2. HRMS (ESI-FT-QQTOF) *m/z*: 451.1622 [M+H]+; calcd. for C23H23N4O6: 451.1618.

***Compound 2l***: A suspension of piperazine (43 mg, 0.5 mmol) paraformaldehyde (15 mg, 0.5 mmol) 2-hydroxy-3-nitro-1,4-naphthoquinone **1** (110 mg, 0.5 mmol) and 2,6-dimethylphenyl isocyanide (65 mg, 0.5 mmol) in MeOH (1 mL) were reacted according to the general procedure A. Flash column chromatography purification (*n*-hex/AcOEt 3:1) afforded compound **2l** (134 mg, 60%) as yellow oil. 1H NMR (400 MHz, CDCl3) δ = 8.71 (s, 1H); 8.30-8.19 (m, 2 H); 7.85-7.75 (m, 2H); 7.12-7.02 (m, 1H); 6.81-6.74 (m,1H); 4.05 (s, 2H); 3.62 (t, *J*= 6.5 Hz, 4H); 2.64 (t, *J*= 6.8 Hz, 4H); 2.18 (2xs, 6H). 13C NMR (100 MHz, CDCl3) δ = 188.6, 181.6, 170.1, 148.7, 137.3, 135.5, 135.1, 134.0, 133.6, 128.9, 127.6, 127.2, 126.8, 122.7, 63.3, 52.8, 52.3, 17.4. HRMS (ESI-FT-QQTOF) *m/z*: 449.1832 [M+H]+; calcd. for C24H25N4O5: 449.1825.

***Compound 2m***: A suspension of piperazine (43 mg, 0.5 mmol) benzaldehyde (51 μL, 0.5 mmol) 2-hydroxy-3-nitro-1,4-naphthoquinone **1** (110 mg, 0.5 mmol) and *tert*-butyl isocyanide (56 μL, 0.5 mmol) in MeOH (1 mL) were reacted according to the general procedure A. Flash column chromatography purification (*n*-hex/AcOEt 4:1) afforded compound **2m** (155 mg, 65%) as pale yellow oil. 1H NMR (400 MHz, CDCl3) δ = 8.32-8.22 (m, 2 H); 7.83-7.75 (m, 2H); 7.60-7.32 (m, 5H); 5.80 (s, 1H); 4.48 (s, 1H); 3.91-3.78 (m, 2H); 3.50-3.41 (m, 2H); 3.03-2.90 (m, 2H); 2.15-2.01 (m, 1H); 1.46 (s, 9H). 13C NMR (100 MHz, CDCl3) δ = 188.4, 180.1, 169.6, 148.1, 136.3, 135.1, 134.7, 133.8, 128.9, 127.5, 126.9, 117.8, 115.9, 113.5, 70.9, 58.7, 52.7, 50.9, 29.3. HRMS (ESI-FT-QQTOF) *m/z*: 477.2142 [M+H]+; calcd. for C26H29N4O5: 477.2138.

***Compound 2n***: A suspension of piperazine (43 mg, 0.5 mmol) butyraldehyde (45 μL, 0.5 mmol) 2-hydroxy-3-nitro-1,4-naphthoquinone **1** (110 mg, 0.5 mmol) and *tert*-butyl isocyanide (56 μL, 0.5 mmol) in MeOH (1 mL) were reacted according to the general procedure A. Flash column chromatography purification (*n*-hex/AcOEt 3:1) afforded compound **2n** (128 mg, 58%) as pale yellow oil. 1H NMR (400 MHz, CDCl3) δ = 8.26-8.17 (m, 2 H); 7.85-7.73 (m, 2H); 5.85 (s, 1H); 3.90-3.79 (m, 2H); 3.47-3.31 (m, 2H); 3.08-3.02 (m, 1H); 2.92-2.83 (m, 1H); 1.98-1.66 (m, 3H); 1.47 (s, 9H); 1.21-1.05 (m, 2H); 0.93 (t, *J*= 6.1 Hz, 3H). 13C NMR (100 MHz, CDCl3) δ = 188.5, 179.3, 172.2, 148.1, 139.5, 137.8, 132.3, 131.1, 126.9, 124.2, 120.5, 67.7, 54.8, 51.9, 47.5, 33.6, 29.8, 19.5, 14.2. HRMS (ESI-FT-QQTOF) *m/z*: 443.2302 [M+H]+; calcd. for C23H31N4O5: 443.2294.

***Compound 2o***: A suspension of 1,3-bis(methylamino)propane (63 μL, 0.5 mmol) paraformaldehyde (15 mg, 0.5 mmol) 2-hydroxy-3-nitro-1,4-naphthoquinone **1** (110 mg, 0.5 mmol) and CN-Gly-Ala-OMe[[1]](#footnote-2) (85 mg, 0.5 mmol) in MeOH (1 mL) were reacted according to the general procedure A. Flash column chromatography purification (*n*-hex/AcOEt 1:1) afforded compound **2o** (159 mg, 63%) as a yellowish solid. 1H NMR (400 MHz, CDCl3) δ = 8.29-8.17 (m, 2 H); 7.86-7.73 (m, 2H); 7.50 (s, 1H); 6.71 (brs, 1H); 4.69 (d, *J*= 12.4 Hz, 1H); 4.52-4.37 (m, 2H); 4.23 (m, *J*= 12.4 Hz, 1H); 3.71 (s, 3H); 3.53 (d, *J*= 7.0 Hz, 1H ); 3.14-3.06 (t, *J*= 7.9 Hz, 1H ); 2.74 (s, 3H); 2.53-2.41 (m, 2H ); 2.38 (s, 3H); 1.68-1.55 (m, 1H); 1.39 (d, *J*= 7.0 Hz, 3H); 1.09-1.01 (m, 1H). 13C NMR (100 MHz, CDCl3) δ = 186.7, 183.3, 172.6, 162.7, 162.1, 146.7, 134.0, 131.9, 131.1, 127.8, 126.0, 123.3, 62.2, 57.6, 52.9, 48.6, 45.3, 43.3, 40.9, 29.8, 24.9, 19.2. HRMS (ESI-FT-QQTOF) *m/z*: 691.2468 [M+H]+; calcd. for C23H30N5O8: 691.2463.

**1H and 13C NMR spectra of the new compounds**

**1H and 13C NMR spectra in CDCl3 of compound 2a**


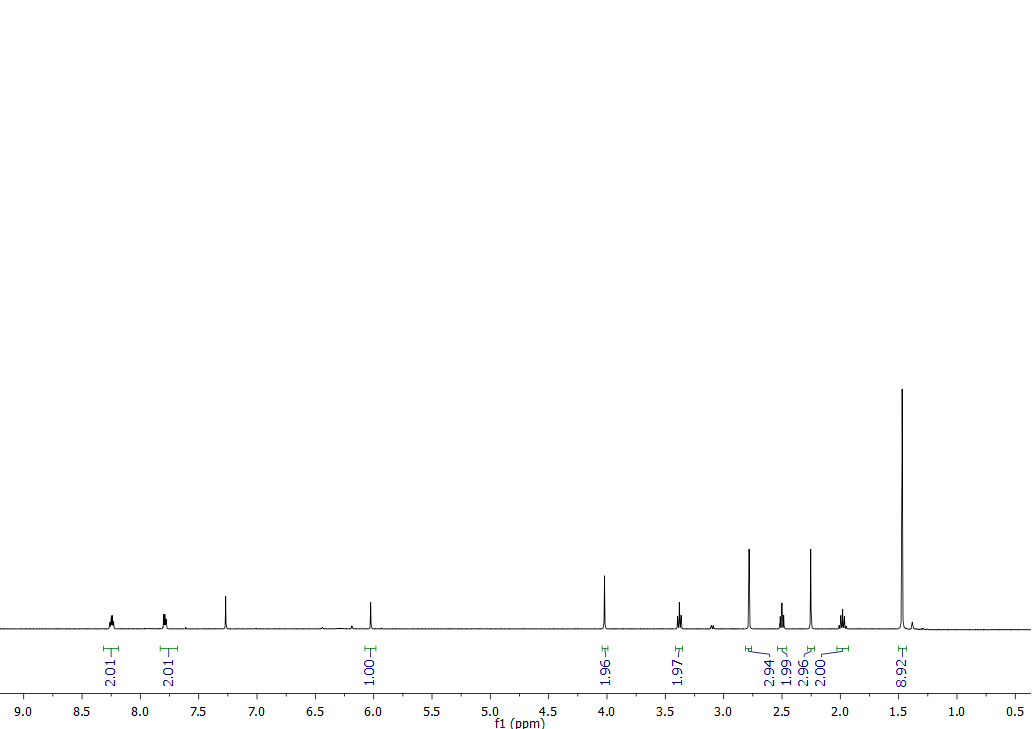


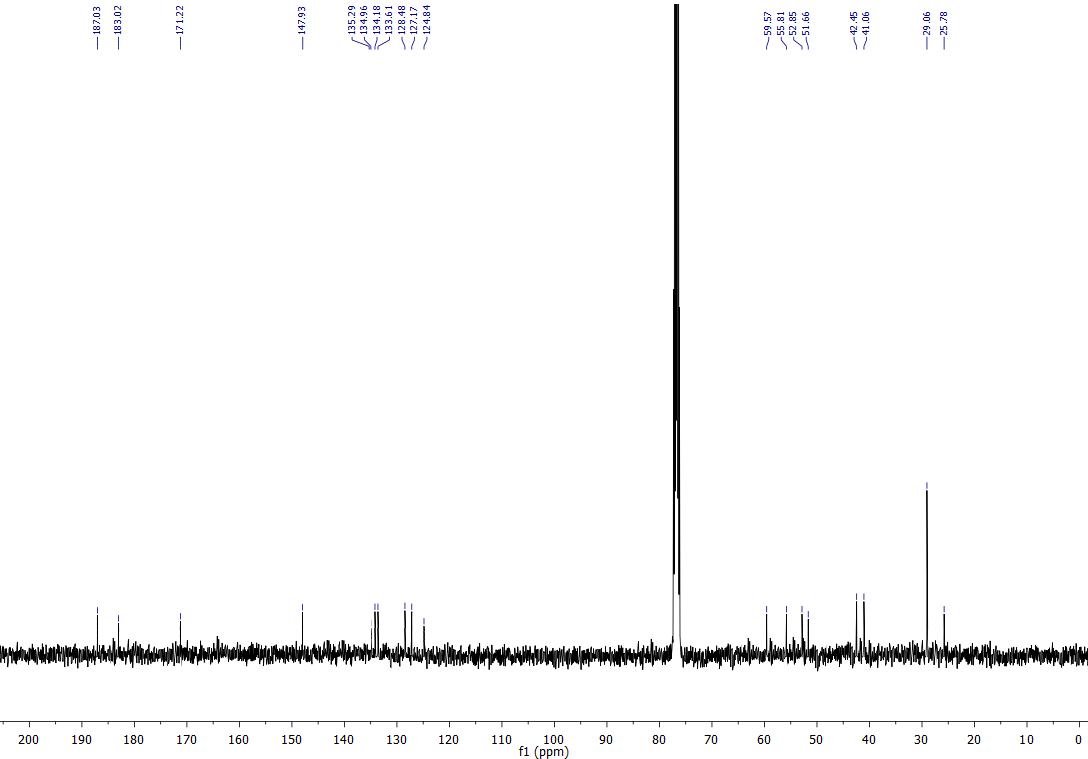


**1H and 13C NMR spectra in CDCl3 of compound 2b**


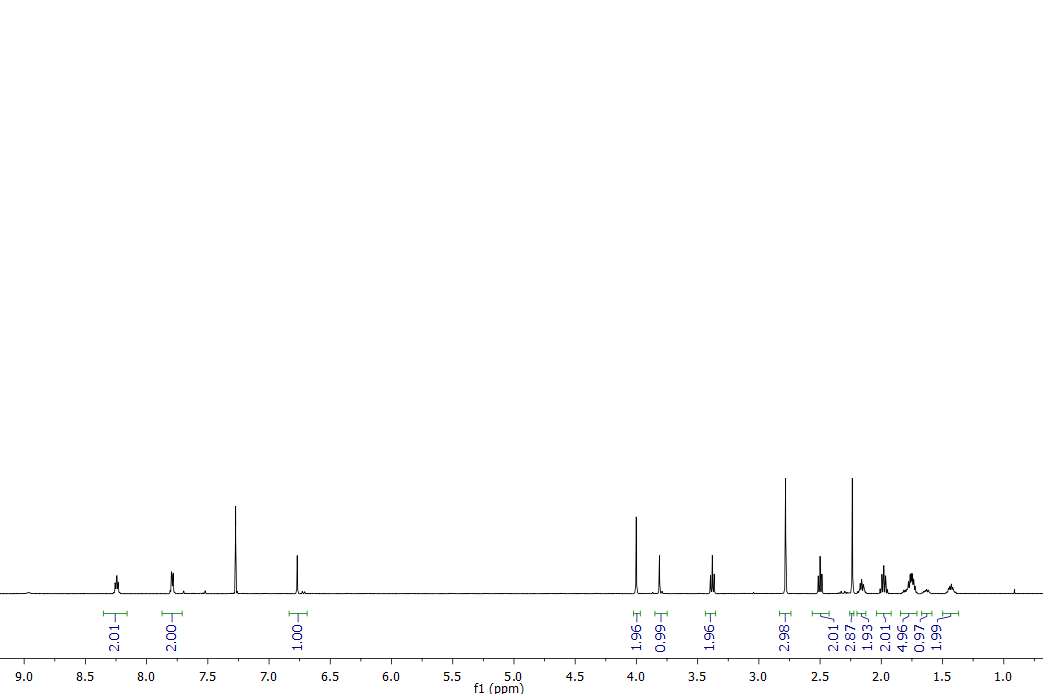


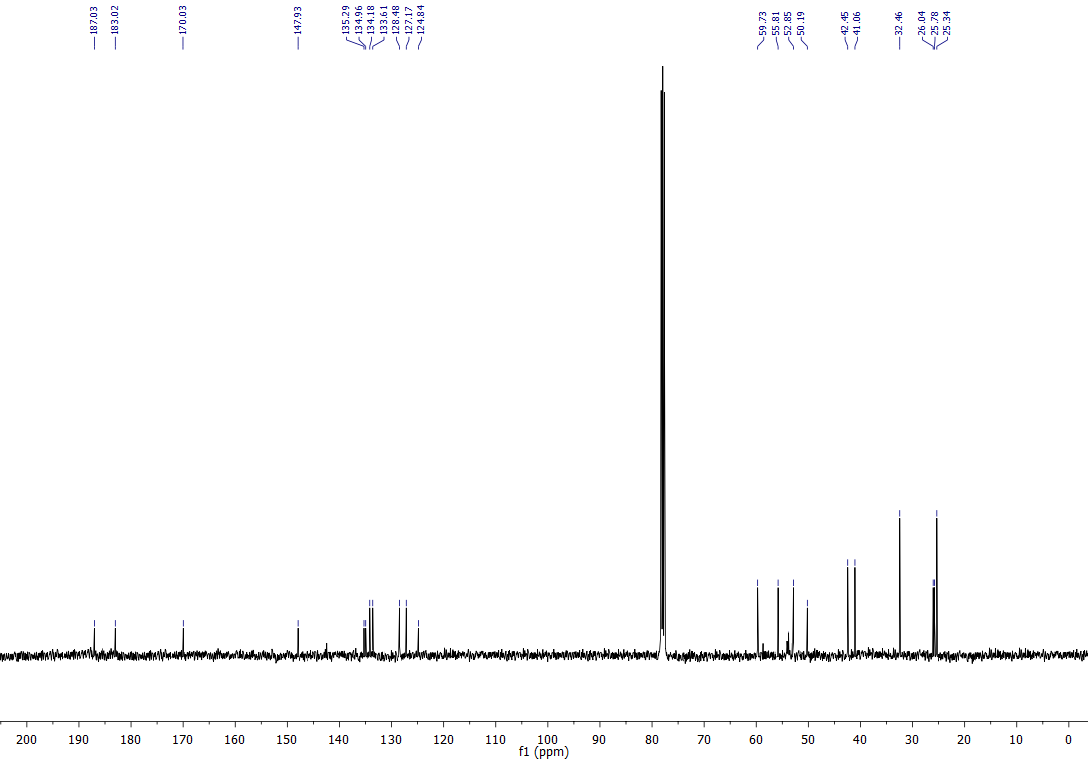


**1H and 13C NMR spectra in CDCl3 of compound 2c**

**
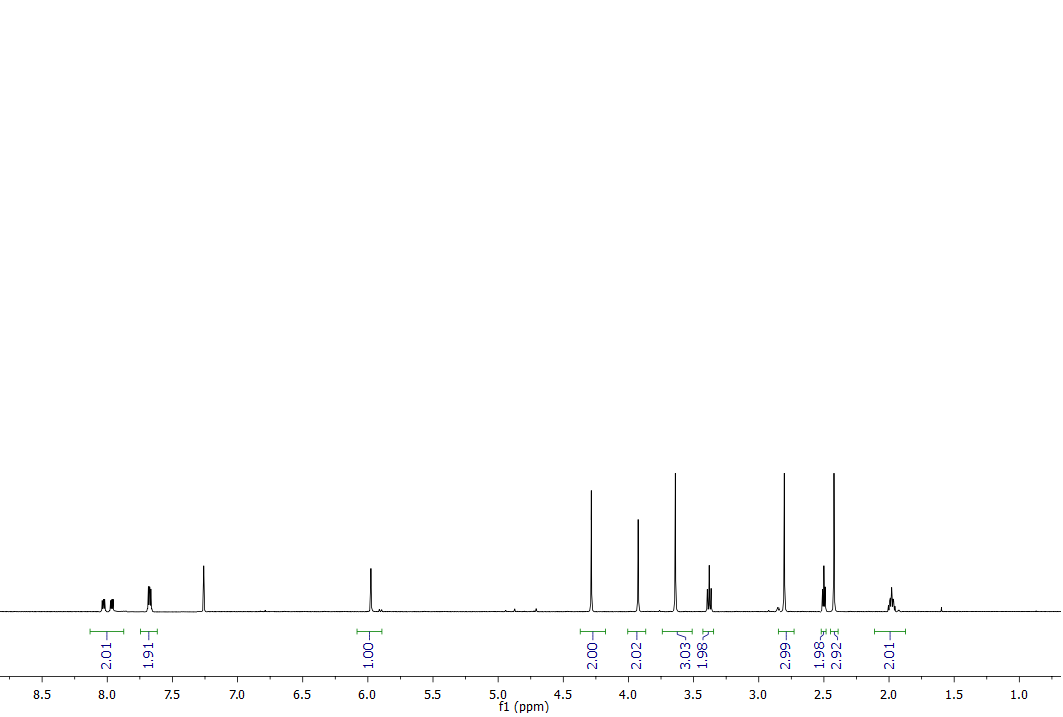
**

**
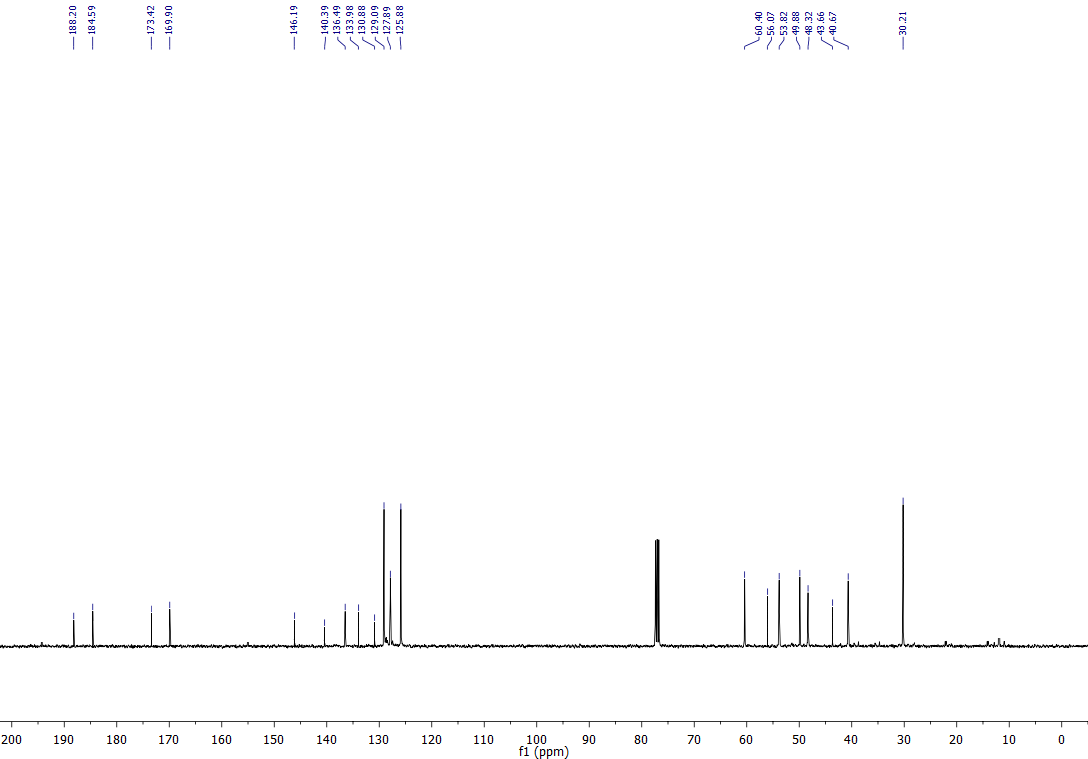
**

**1H and 13C NMR spectra in CDCl3 of compound 2d**

**
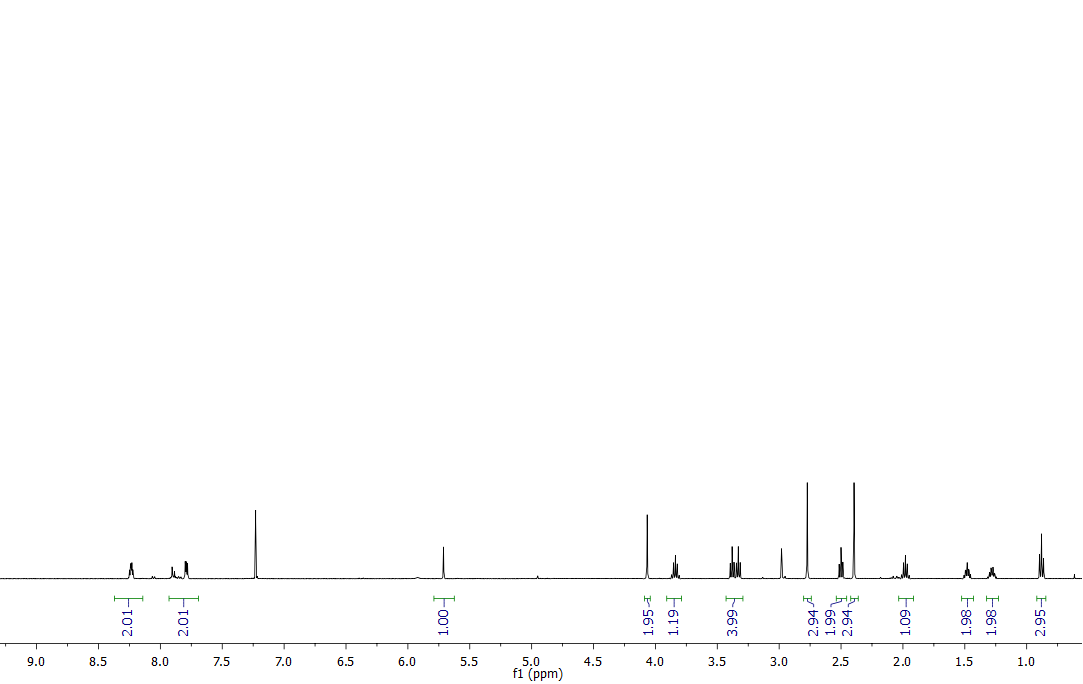
**

**
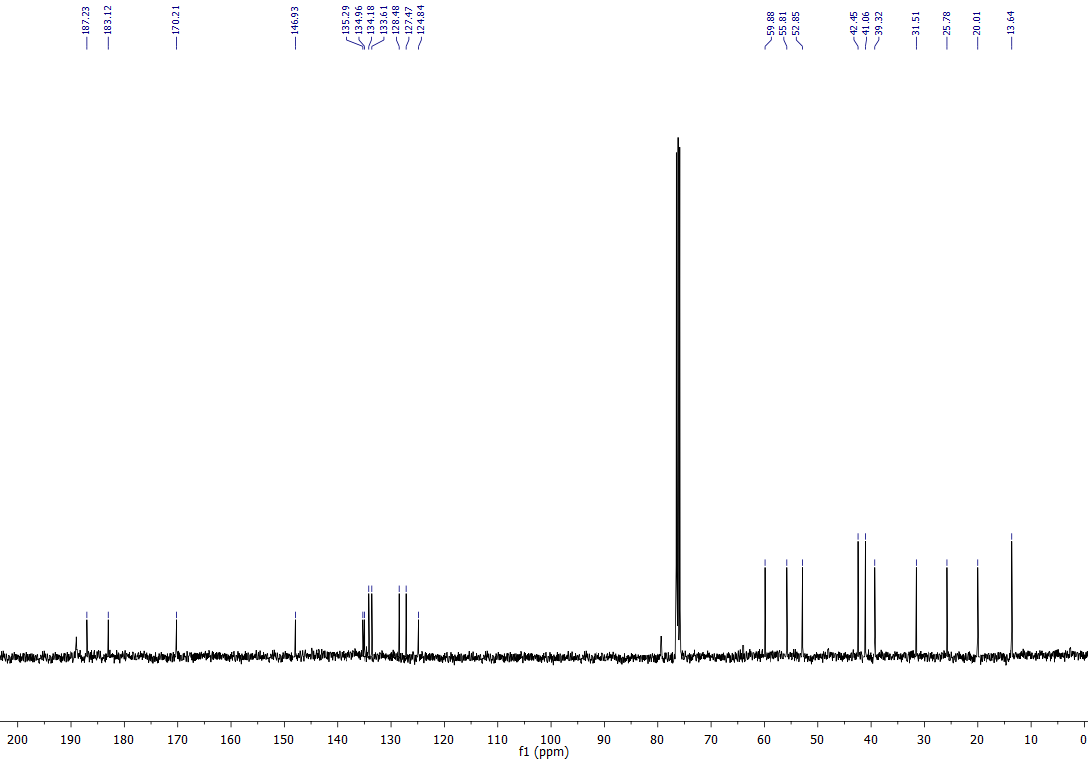
**

**1H and 13C NMR spectra in CDCl3 of compound 2e**

**
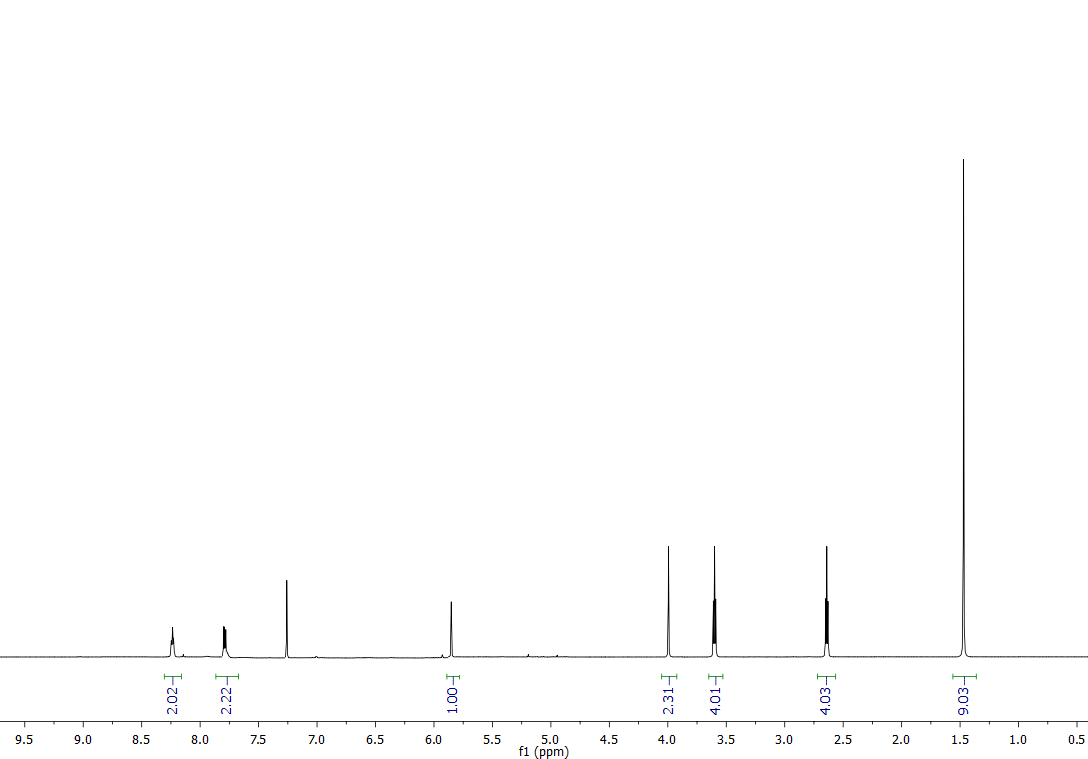
**

**
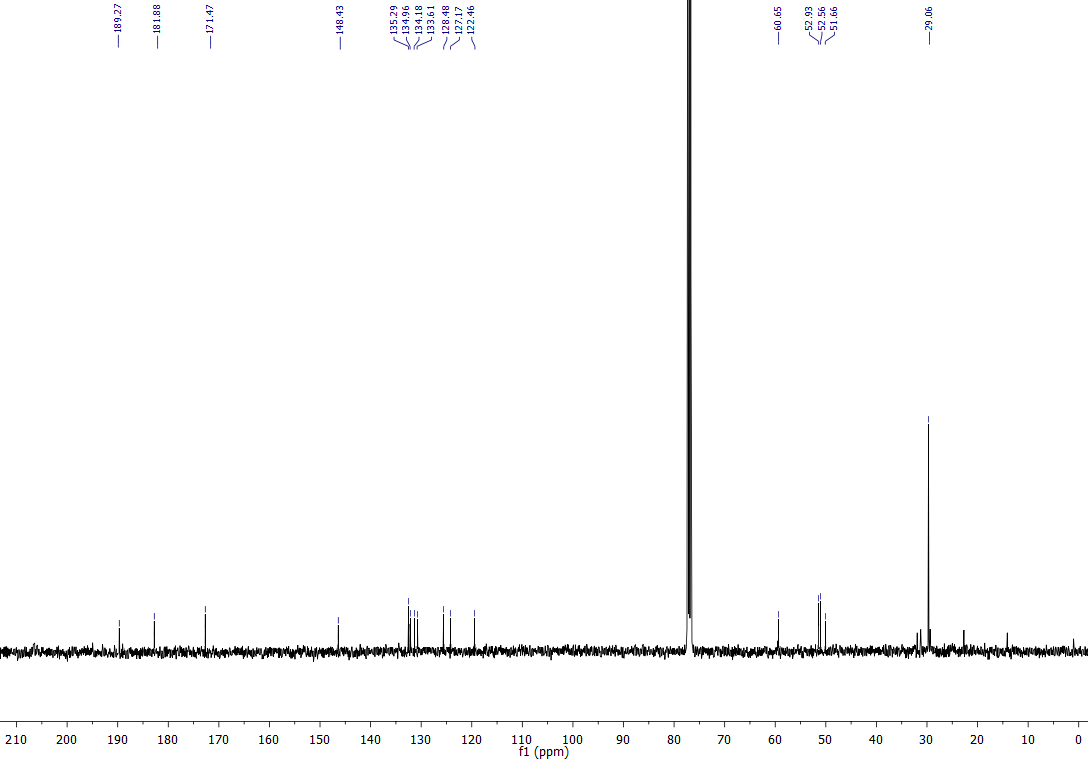
**

**1H and 13C NMR spectra in CDCl3 of compound 2f**

**
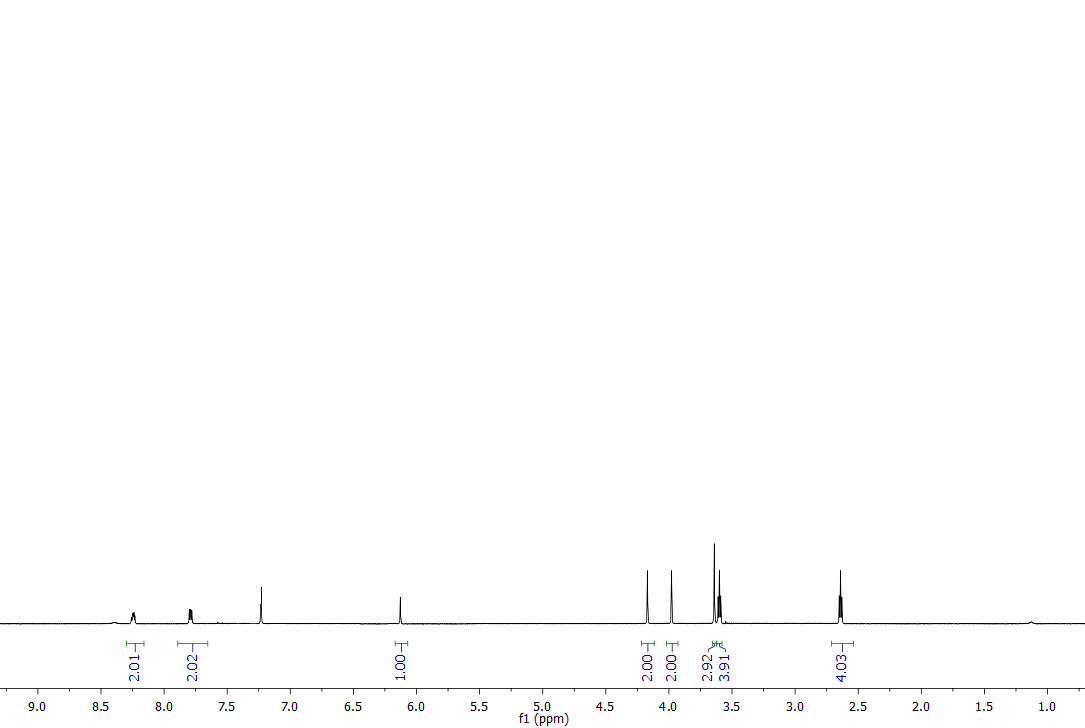
**

**
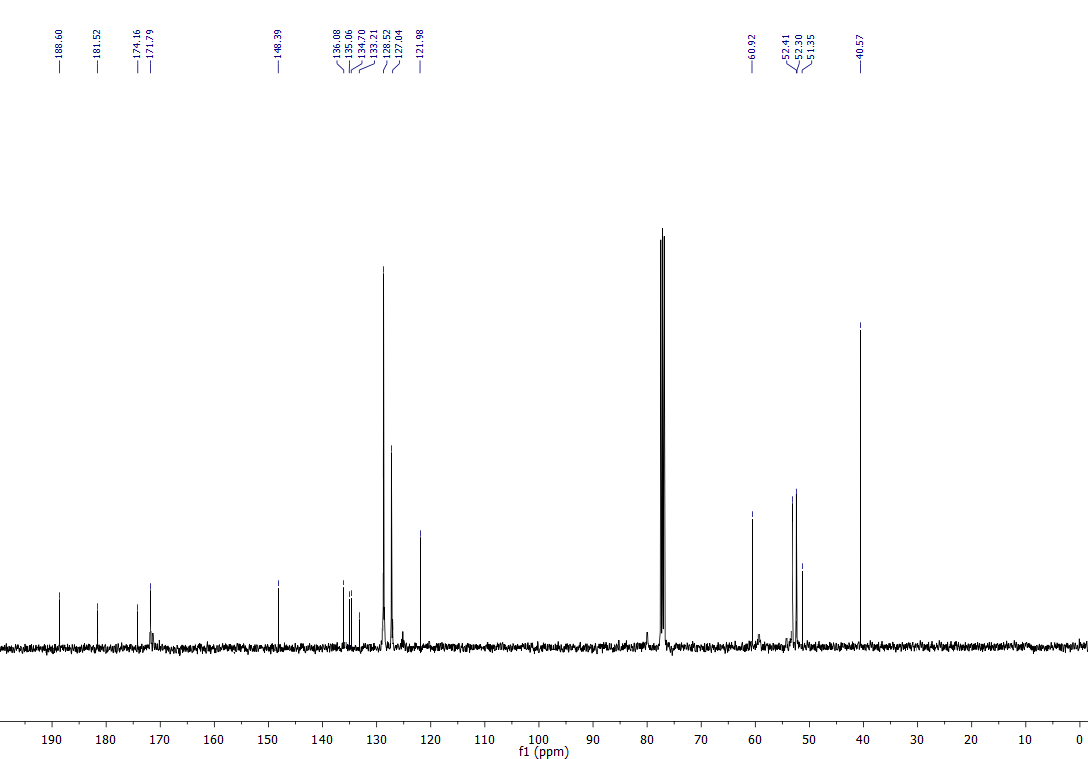
**

**1H and 13C NMR spectra in CDCl3 of compound 2g**

**
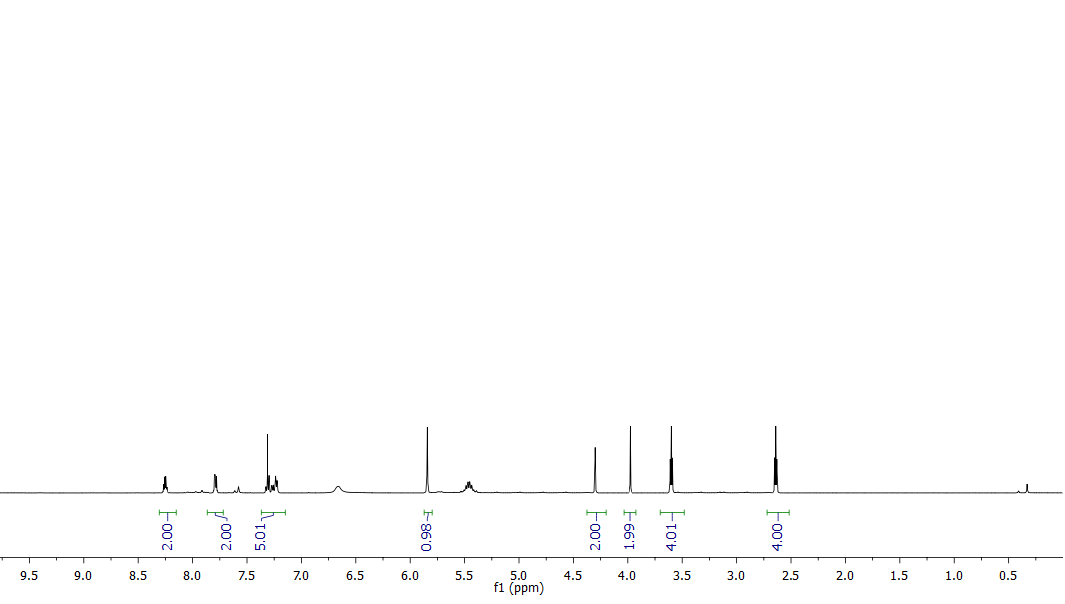
**

**
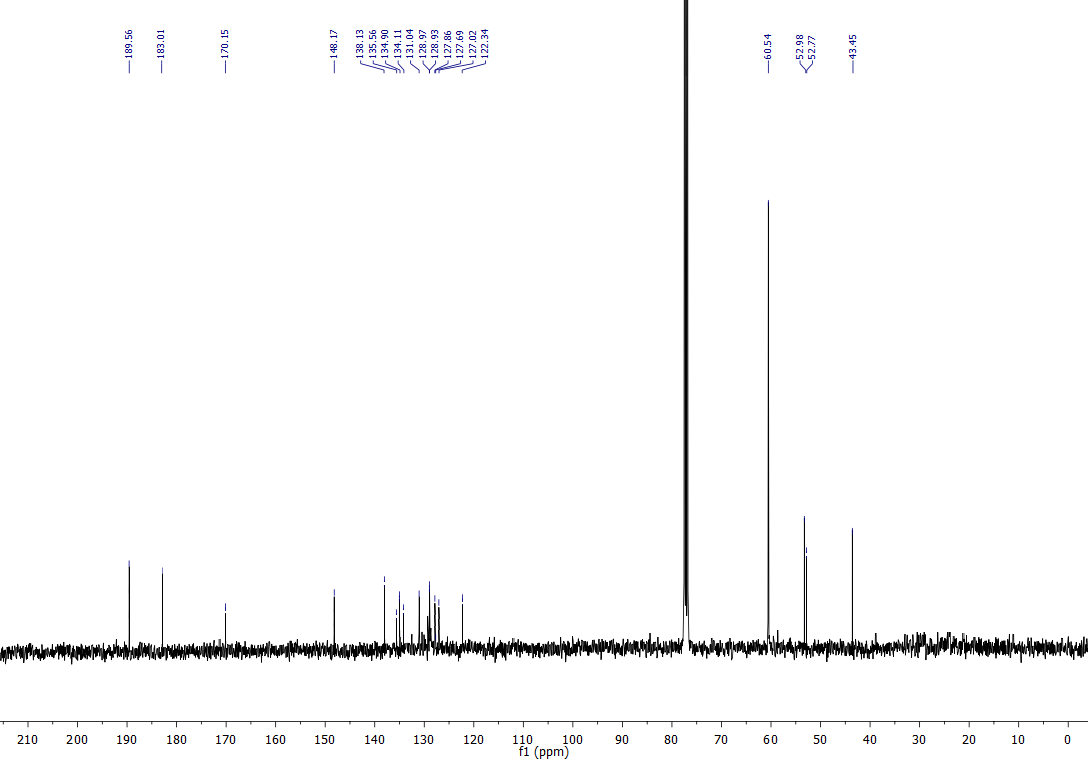
**

**1H and 13C NMR spectra in CDCl3 of compound 2h**

**
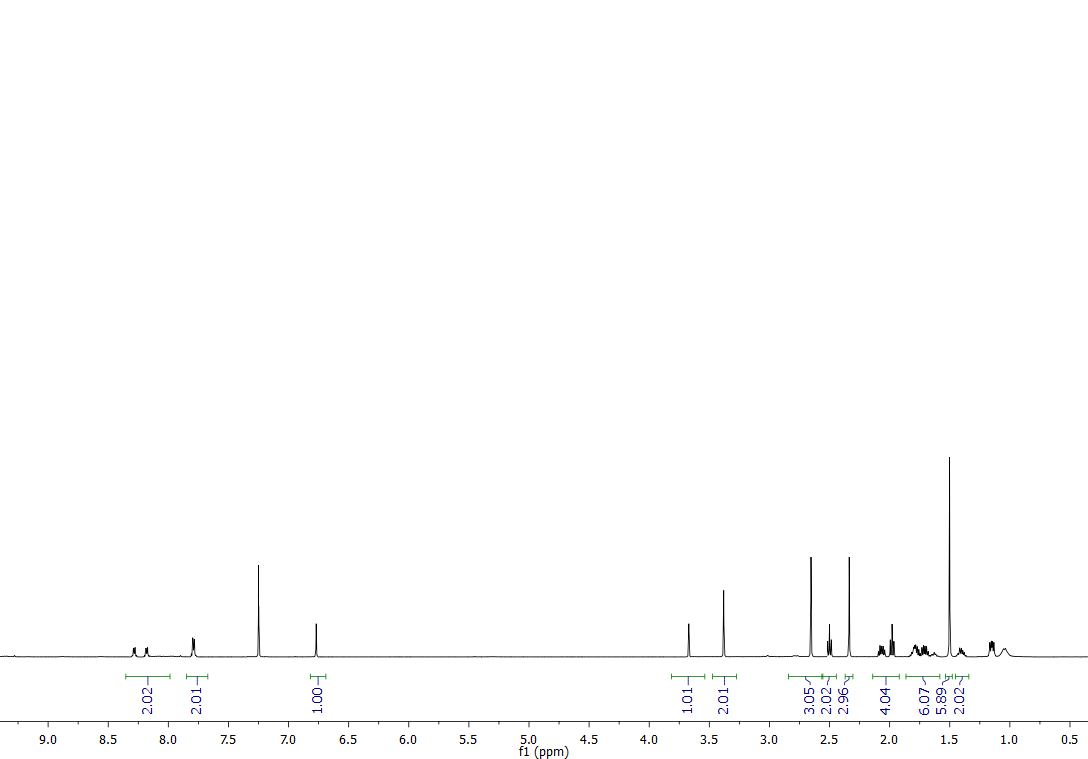
**

**
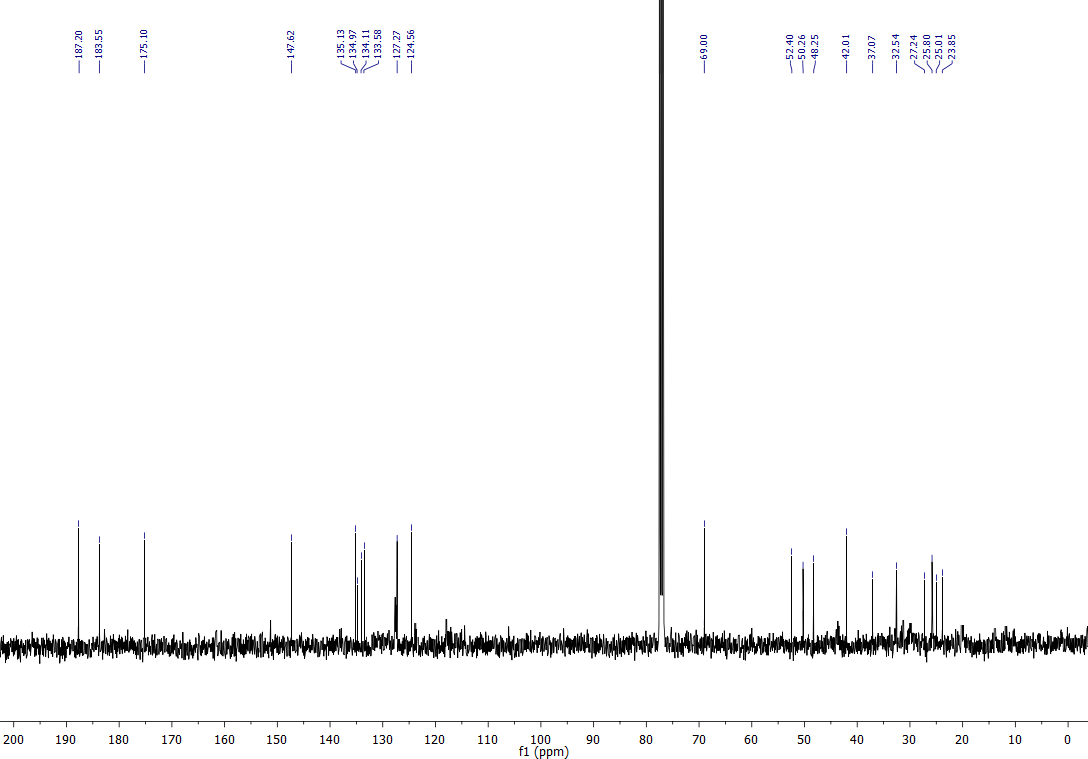
**

**1H and 13C NMR spectra in CDCl3 of compound 2i**

**
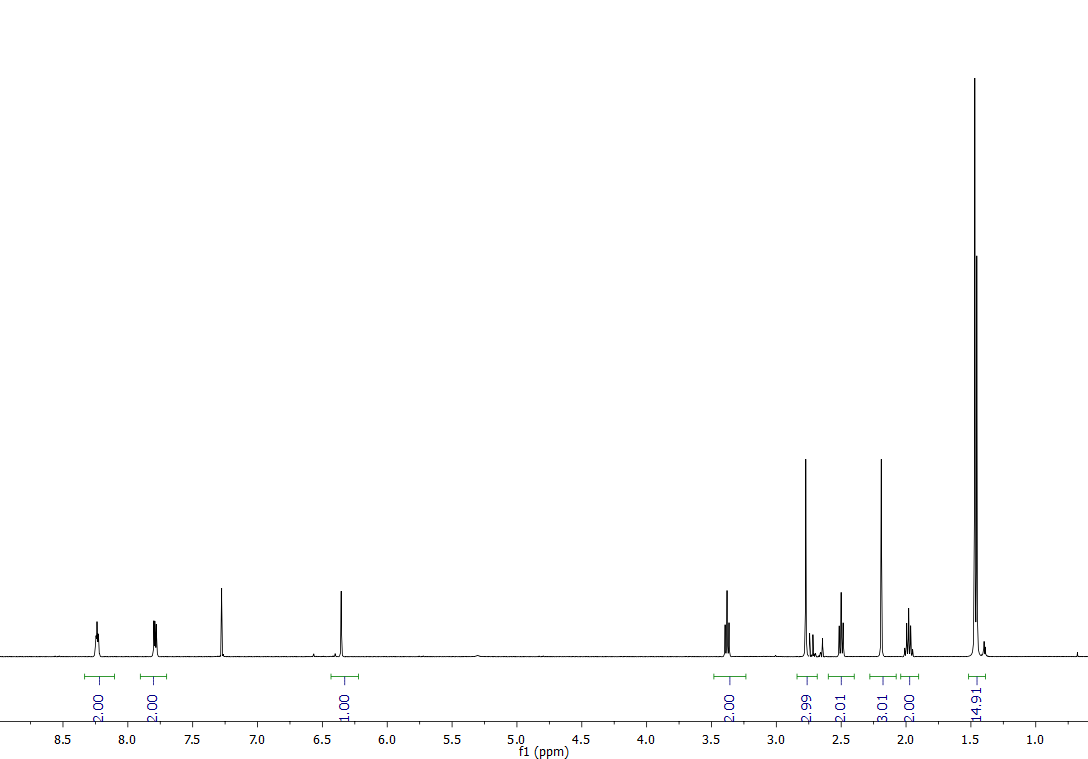
**

**
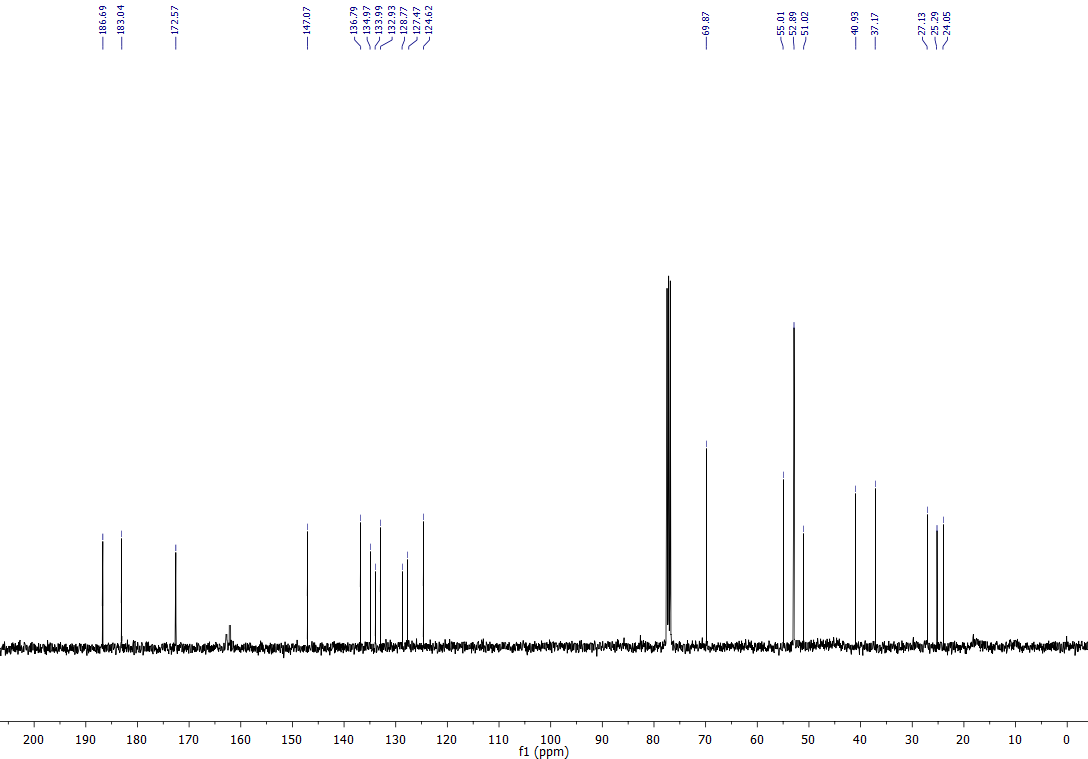
**

**1H and 13C NMR spectra in CDCl3 of compound 2j**

**
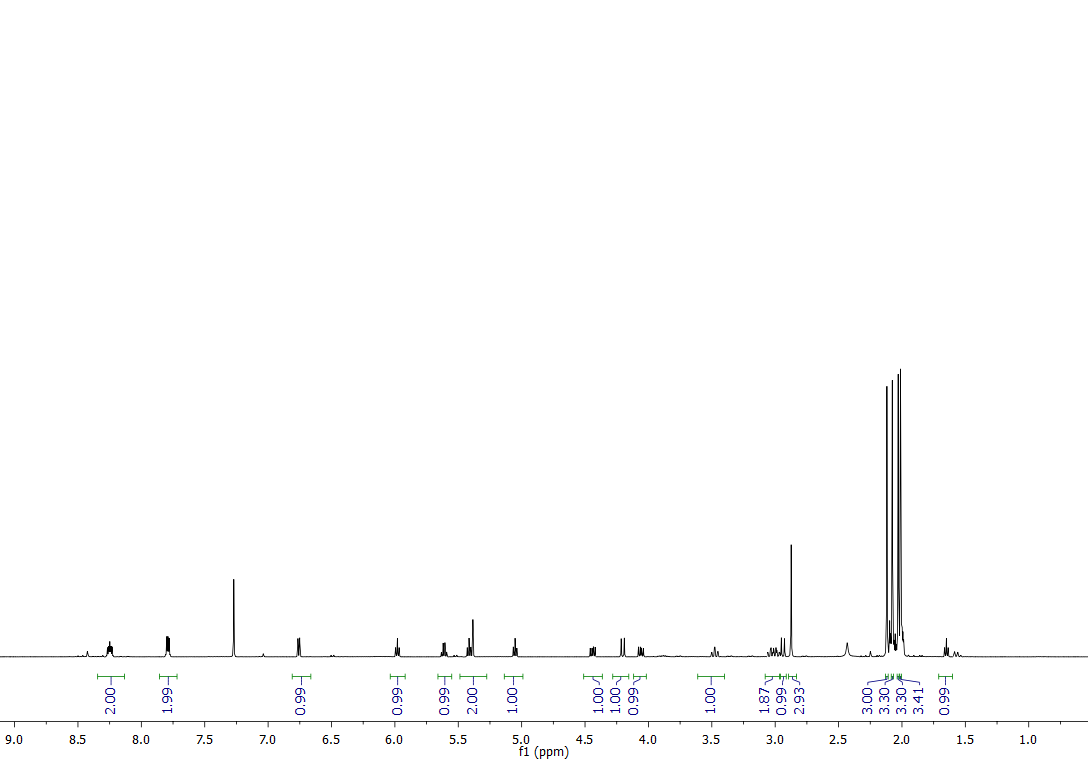
**

**
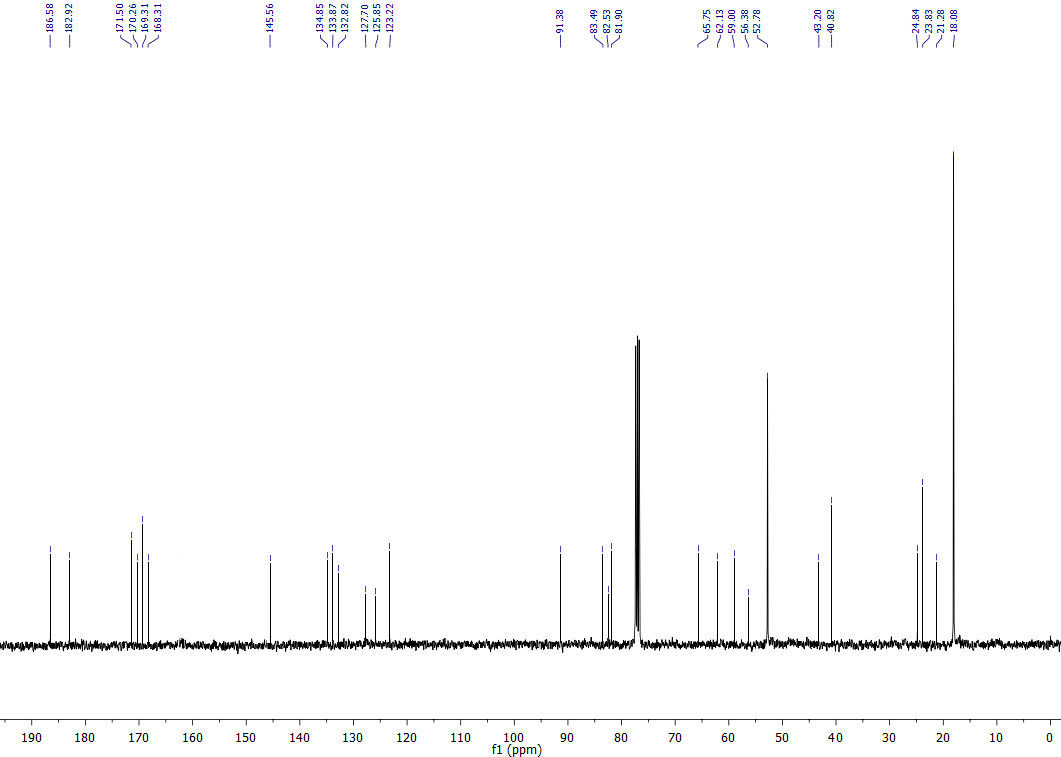
**

**1H and 13C NMR spectra in CDCl3 of compound 2k**

**
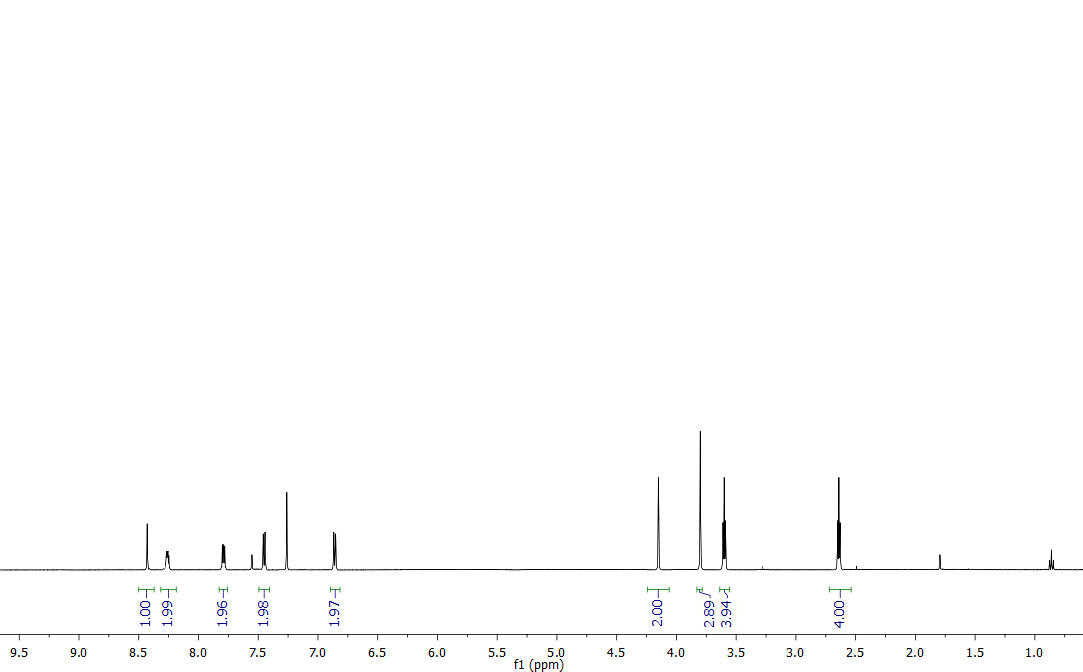
**

**
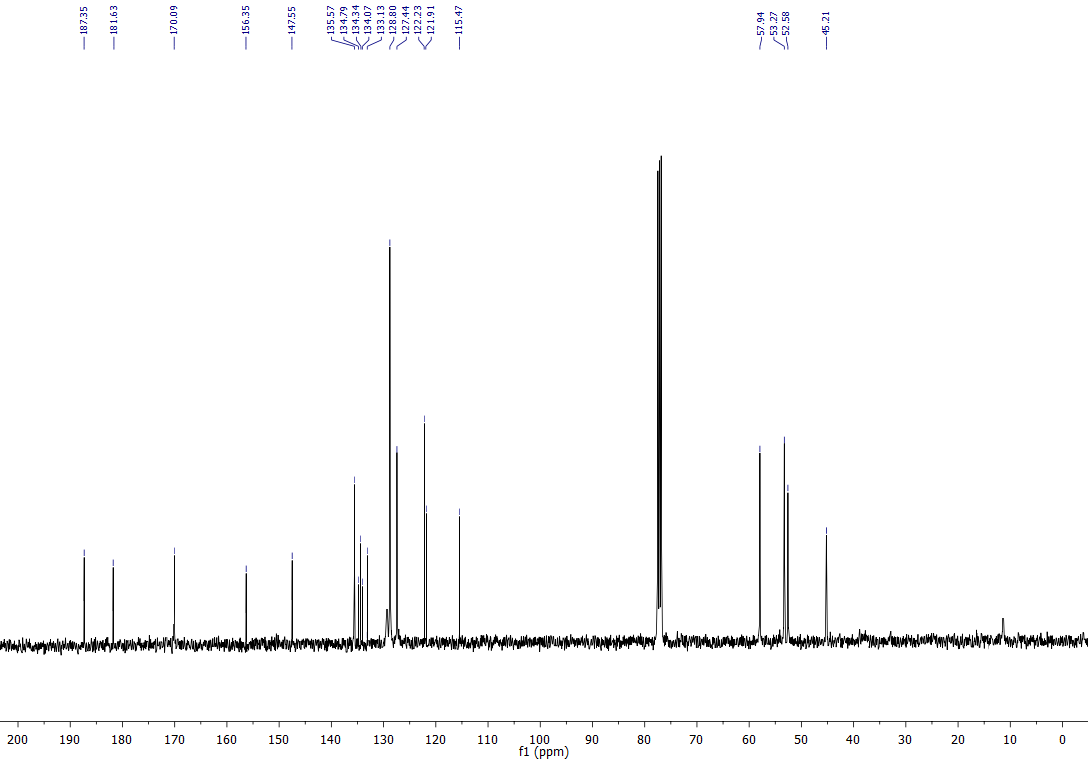
**

**1H and 13C NMR spectra in CDCl3 of compound 2l**

**
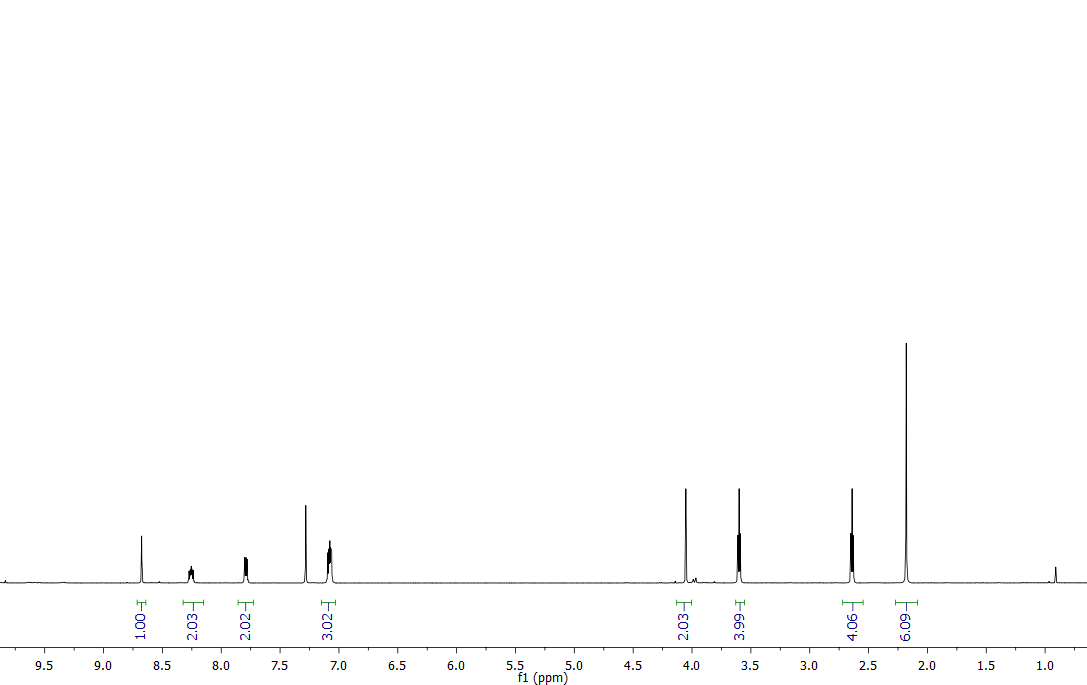
**

**
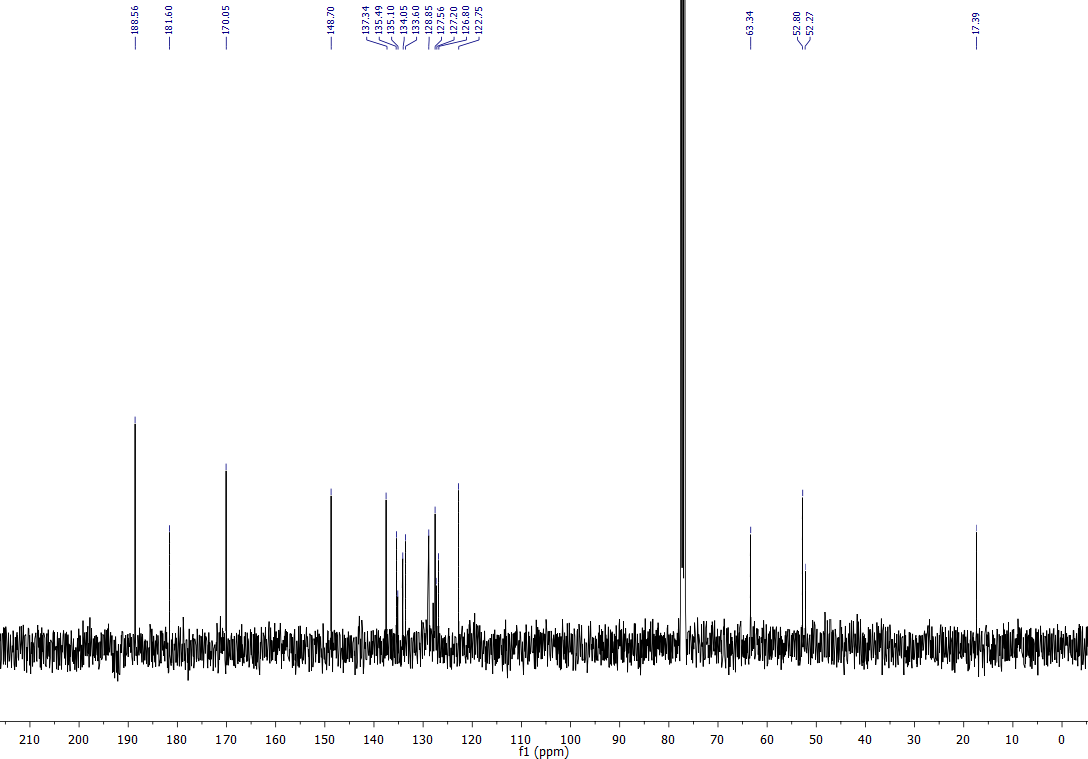
**

**1H and 13C NMR spectra in CDCl3 of compound 2m**

**
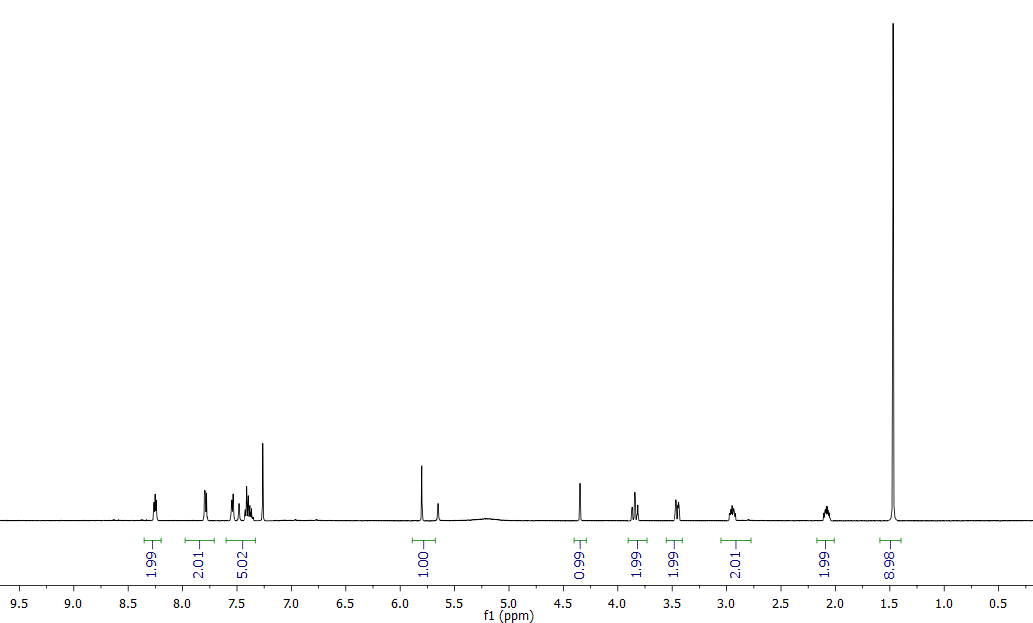
**

**
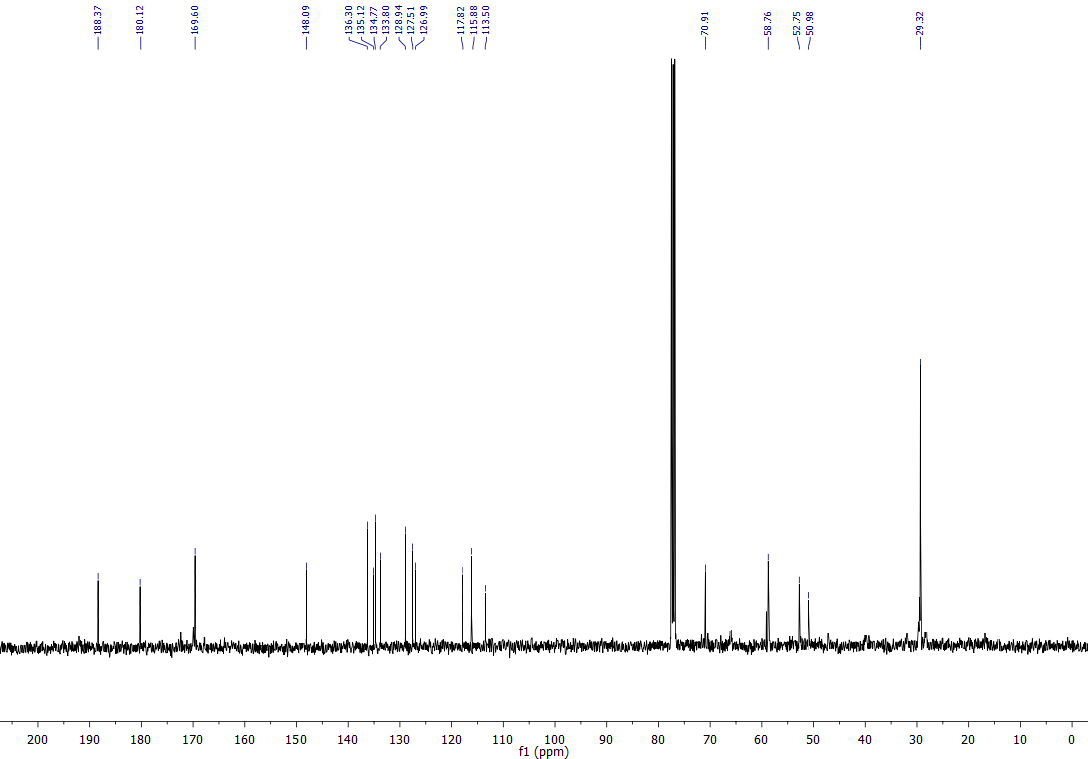
**

**1H and 13C NMR spectra in CDCl3 of compound 2n**

**
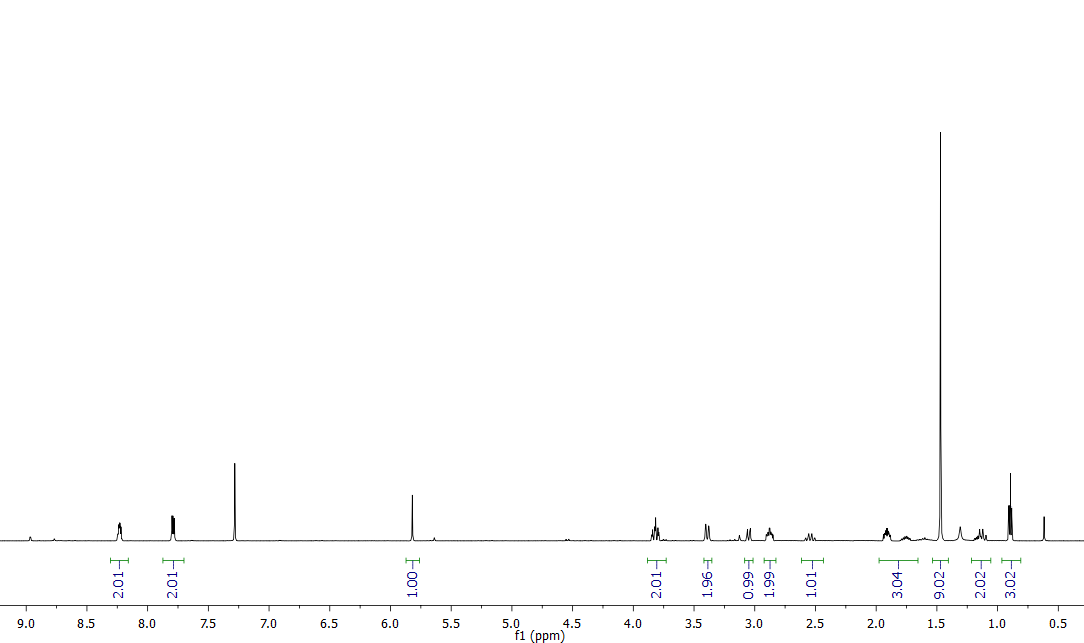
**

**
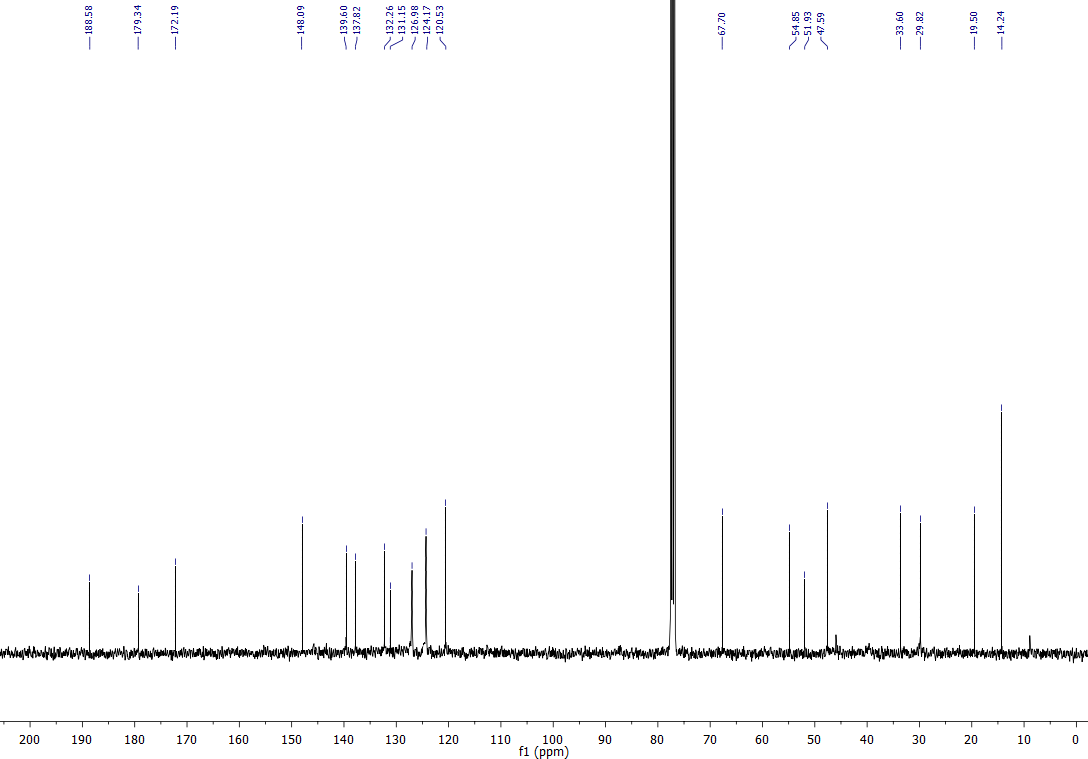
**

**1H and 13C NMR spectra in CDCl3 of compound 2o**

**
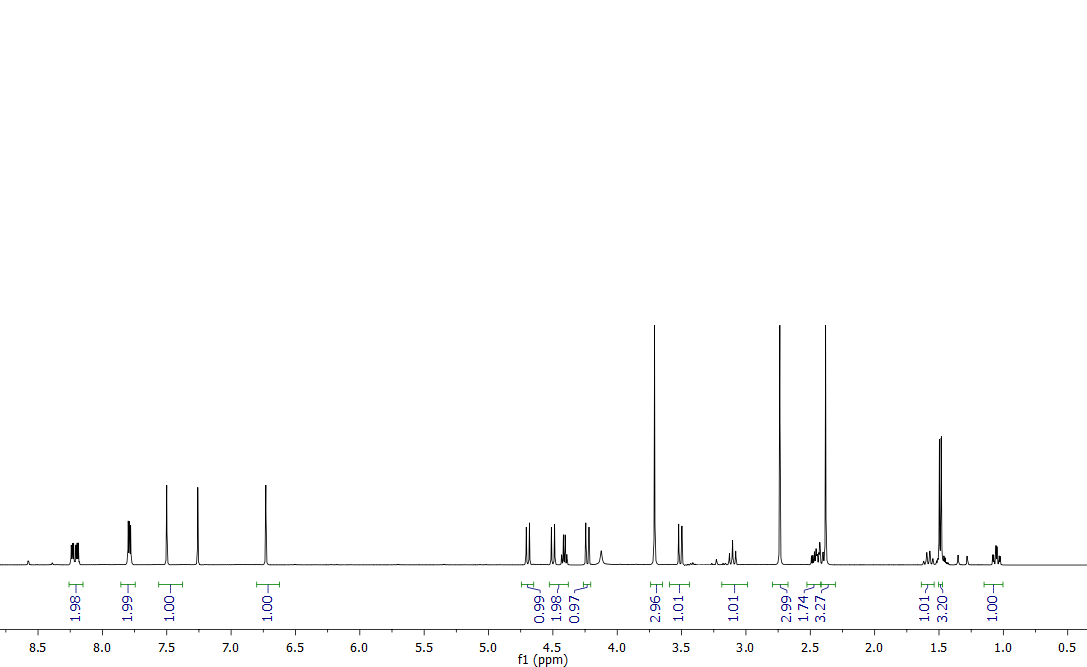
**

**
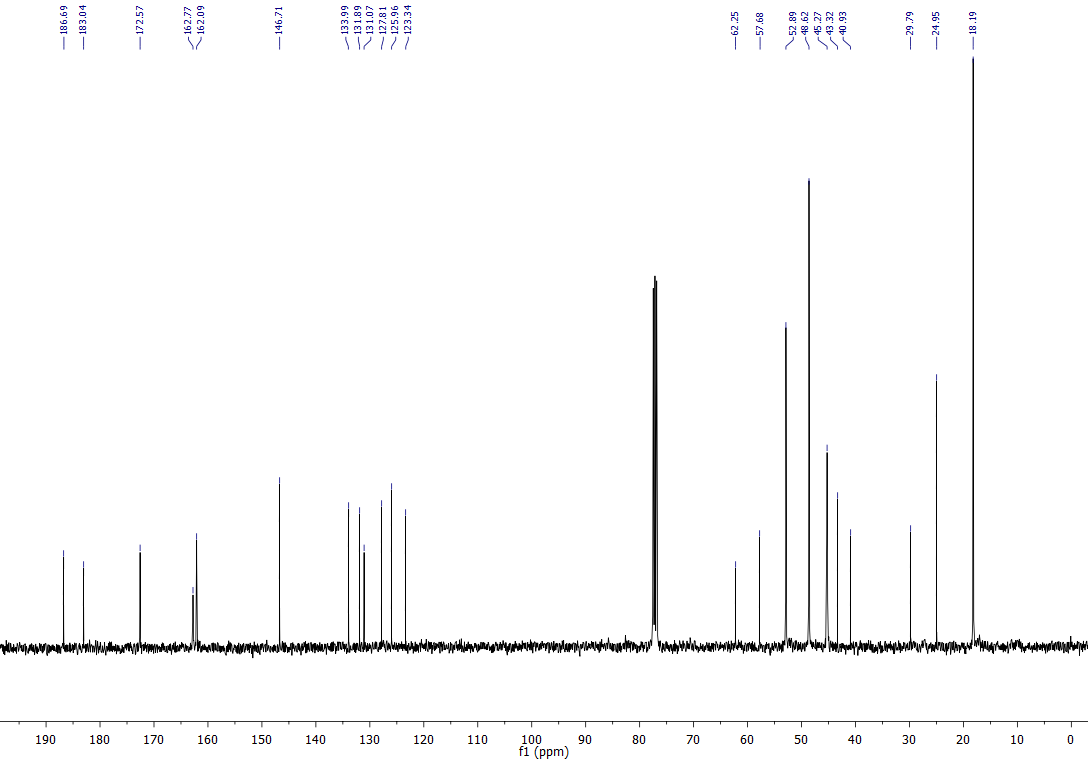
**

**HRMS (ESI-FT-QqTOF) of selected products**

**Compound 2a**

**
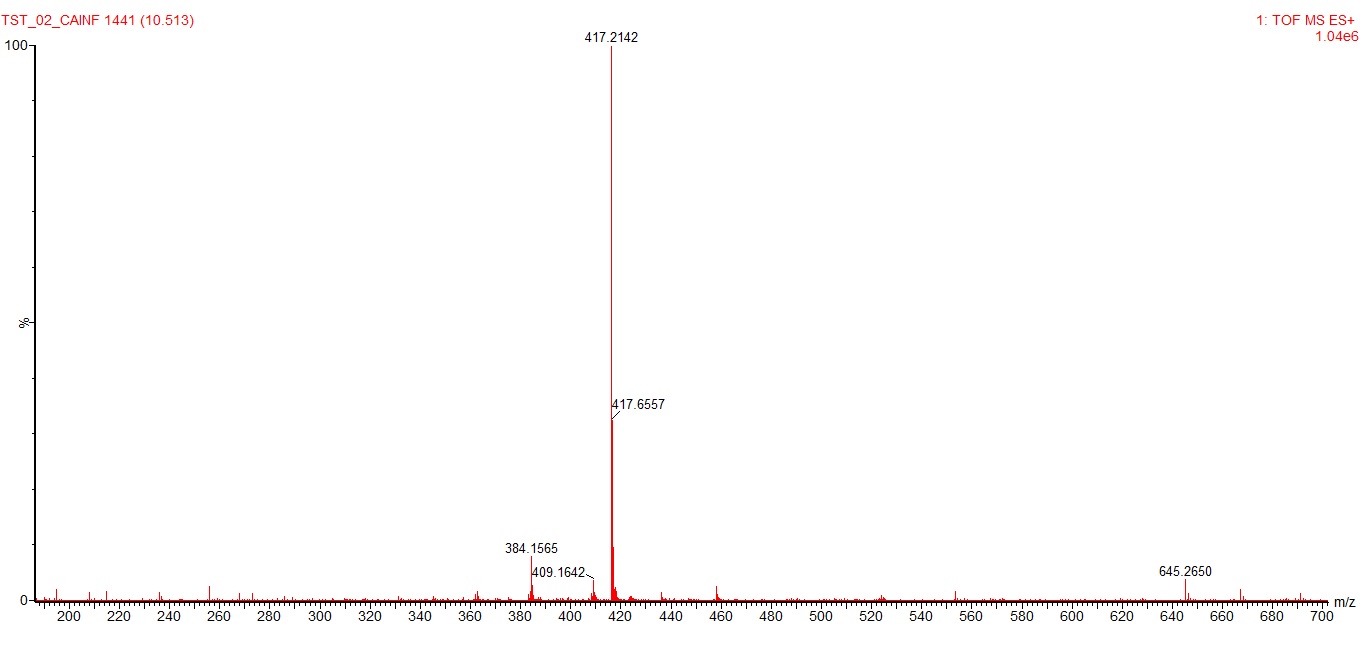
**

**Compound 2b**

**
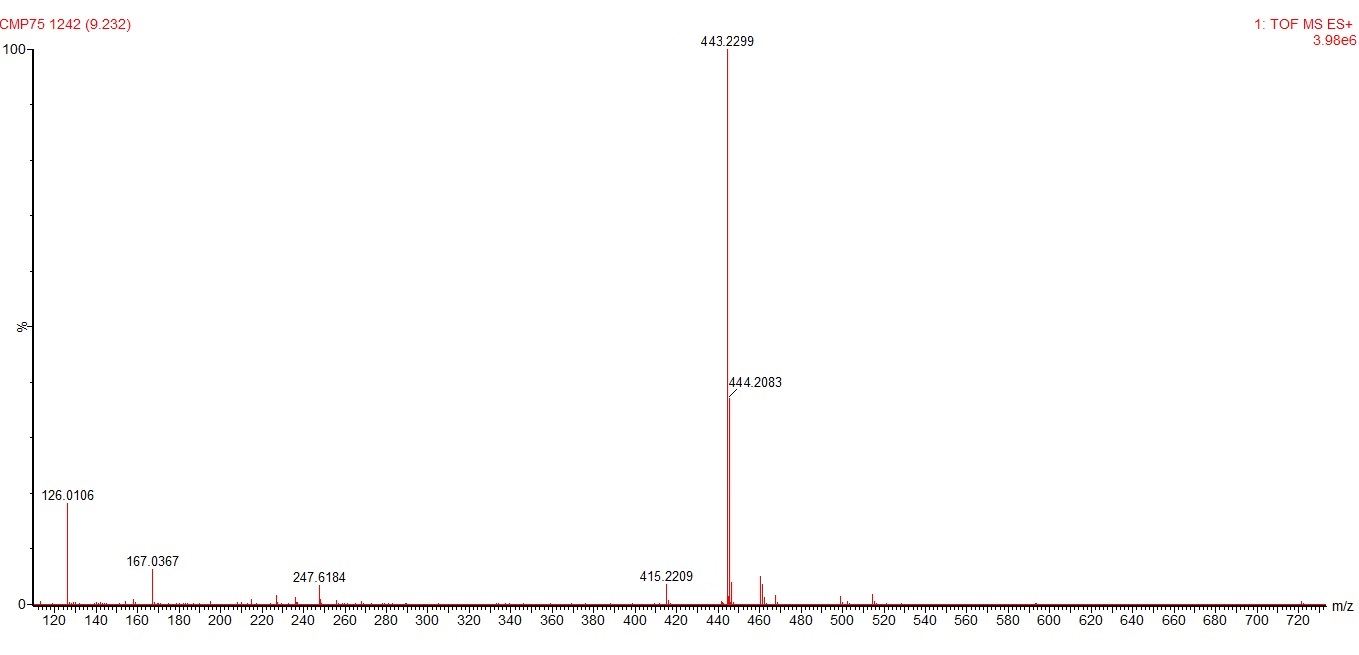
**

**Compound 2c**

**
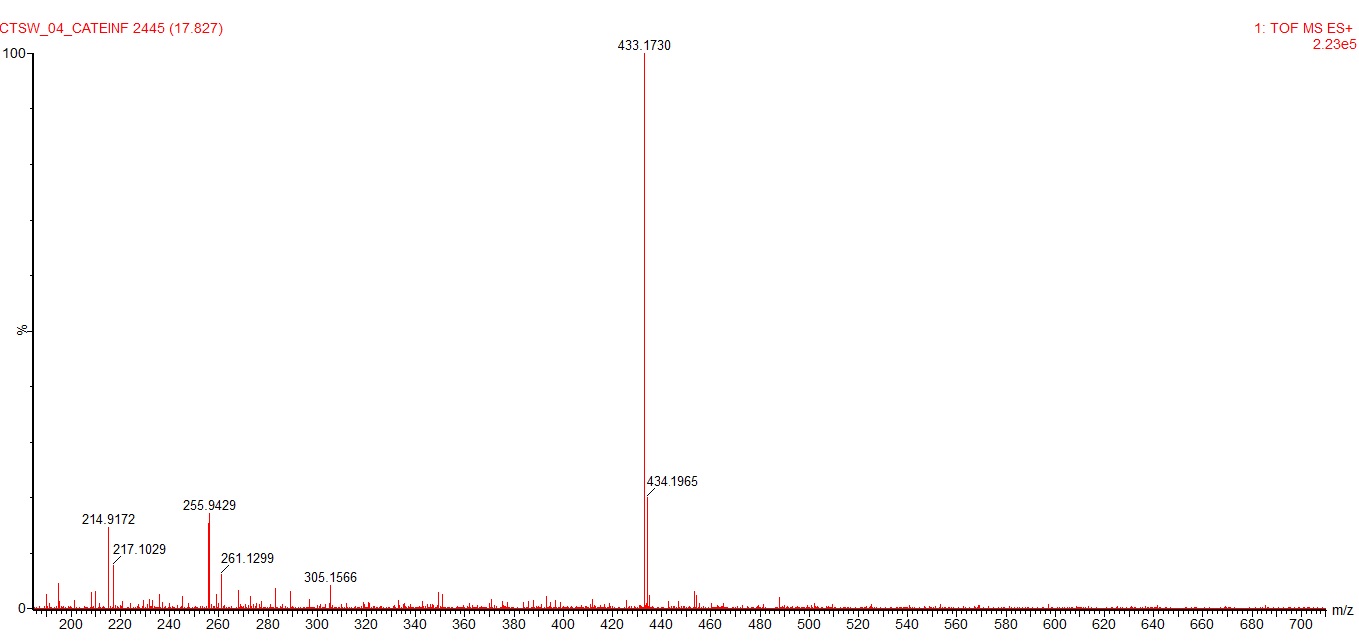
**

**Compound 2d**

**
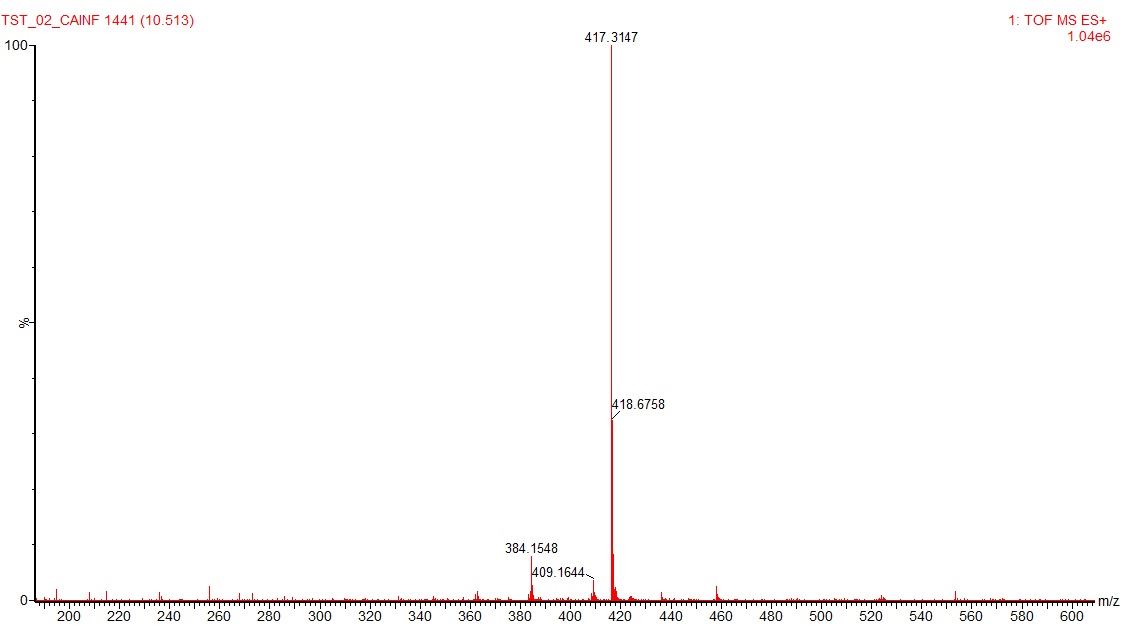
**

**Chiral Stationary Phase HPLC Chromatograms**

Chiral stationary-phase HPLC chromatogram of compound **5m**.

*n*-hexane/*i*-PrOH 90:10 AD-H at 1 mL/min.


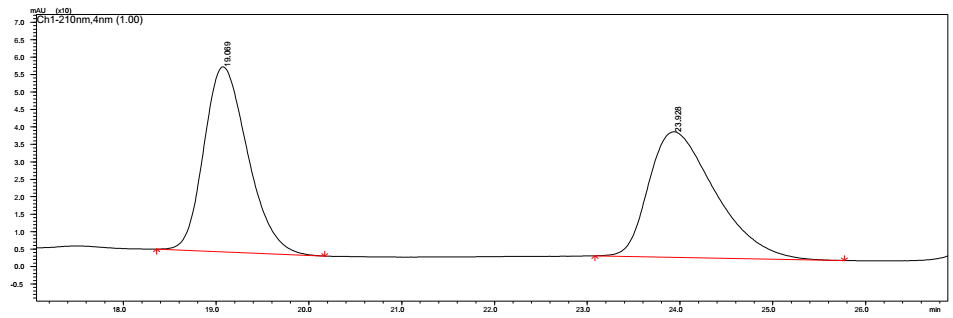


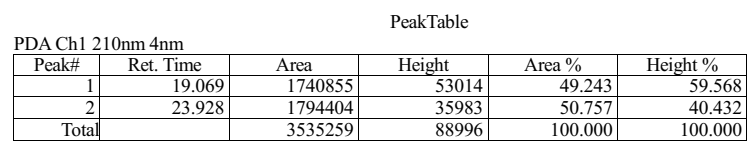


Chiral stationary-phase HPLC chromatogram of compound **5n**.

*n*-hexane/*i*-PrOH 90:10 AD-H at 0.8 mL/min.


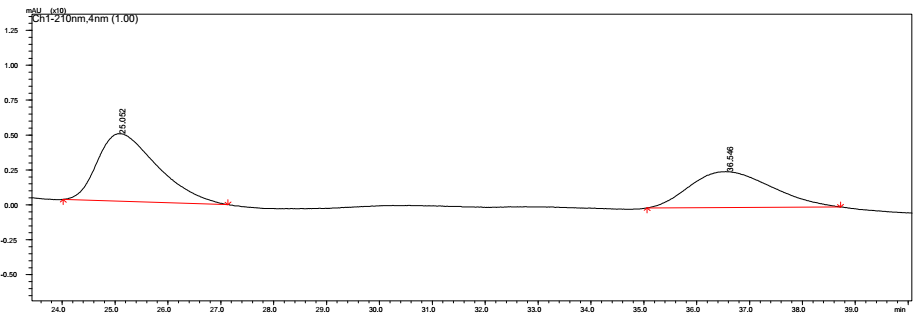


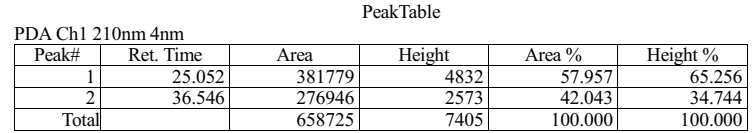


1. Echemendía R, de la Torre A. F, Monteiro J.L, Pila, M.; Corrêa, A. G.; Westermann, B.; Rivera, D. G.; Paixão, M. W. *Angew Chem Int Ed*. **2015**, 7621-7625. [↑](#footnote-ref-2)
